# Supplementary material for: A High-Throughput Method for Identifying Novel Genes That Influence Metabolic Pathways Reveals New Iron and Heme Regulation in Pseudomonas aeruginosa
Source: PubMed Central journal article supplement (PMC7857532; doi:10.1128/msystems.00933-20), 2021-02-02
Supplement: mSystems.00933-20-st001.pdf [file mSystems.00933-20-st001.pdf]

Table S1A. Met-Seq Enriched Open Reading Frames\*

| Gene ID** | Name       | Category *** | Annotation                                                                               | Ave Unique hits (treatment) | Ave. Unique hits (control) | Ave. Raw Reads (treatment) | Ave. Raw Read (control) | Ratio_ Insertions (Treatment/control) | Log2-fold Change (Insertions) | Ratio_ reads (Treatment/control) | Log2-fold Change (reads) | pvalue (proportions_ reads) | Adj. pvalue (proportions_ reads) |
|-----------|------------|--------------|------------------------------------------------------------------------------------------|-----------------------------|----------------------------|----------------------------|-------------------------|---------------------------------------|-------------------------------|----------------------------------|--------------------------|-----------------------------|----------------------------------|
| PA0709    |            | 3            | ABM domain protein                                                                       | 1.00                        | 0.00                       | 136.00                     | 0.00                    | 9.72                                  | 3.28                          | 41.32                            | 5.37                     | 1.29E-10                    | 2.14E-09                         |
| PA0747    |            | 3            | Probable aldehyde dehydrogenase                                                          | 1.00                        | 0.00                       | 134.00                     | 0.00                    | 9.72                                  | 3.28                          | 41.32                            | 5.37                     | 1.29E-10                    | 2.14E-09                         |
| PA0959    |            | 10           | HIT domain protein                                                                       | 1.00                        | 0.00                       | 192.00                     | 0.00                    | 9.72                                  | 3.28                          | 41.32                            | 5.37                     | 1.29E-10                    | 2.14E-09                         |
| PA3751    | PurT       | 3            | Phosphoribosylglycinamide formyltransferase 2 (purine biosynthesis)                      | 1.00                        | 0.00                       | 162.00                     | 0.00                    | 9.72                                  | 3.28                          | 41.32                            | 5.37                     | 1.29E-10                    | 2.14E-09                         |
| PA3798    |            | 3            | PLP-dependent aminotransferase or kynurenine aminotransferase (putative)                 | 1.00                        | 0.00                       | 119.00                     | 0.00                    | 9.72                                  | 3.28                          | 41.32                            | 5.37                     | 1.29E-10                    | 2.14E-09                         |
| PA5457    | WbdD       | 3            | Common polysaccharide antigen (CPA) biosynthesis (O-antigen synthesis methyltransferase) | 1.00                        | 0.00                       | 621.00                     | 0.00                    | 9.72                                  | 3.28                          | 41.32                            | 5.37                     | 1.29E-10                    | 2.14E-09                         |
| PA1963    |            | 16           | Hydrophobic peptide required for survival in oxygen                                      | 1.00                        | 0.00                       | 23.00                      | 0.00                    | 9.72                                  | 3.28                          | 14.62                            | 3.87                     | 1.31E-04                    | 1.46E-04                         |
| PA1108    |            | 9            | Tet resistance protein (transporter)                                                     | 1.00                        | 0.00                       | 22.00                      | 0.00                    | 9.72                                  | 3.28                          | 13.98                            | 3.81                     | 1.84E-04                    | 2.04E-04                         |
| PA0527    | Dnr        | 13           | Transcriptional regulator Dnr                                                            | 1.00                        | 0.00                       | 10.00                      | 0.00                    | 9.72                                  | 3.28                          | 6.36                             | 2.67                     | 1.17E-02                    | 1.24E-02                         |
| PA0028    |            | 16           | Phosphatidylethanolamine (PE) lipid taxis system (3' to HemF operon)                     | 1.00                        | 1.00                       | 147.00                     | 91.00                   | 1.00                                  | 0.00                          | 4.13                             | 2.05                     | 5.74E-06                    | 2.86E-05                         |
| PA0099    |            | 8            | VrgB1-dependent nuclease toxin secreted by T6SS                                          | 1.00                        | 1.00                       | 272.00                     | 95.00                   | 1.00                                  | 0.00                          | 4.13                             | 2.05                     | 5.74E-06                    | 2.86E-05                         |
| PA0149    |            | 13           | Sigma-70 factor, ECF subfamily; Regulates iron/metal uptake                              | 1.00                        | 1.00                       | 131.00                     | 165.00                  | 1.00                                  | 0.00                          | 4.13                             | 2.05                     | 5.74E-06                    | 2.86E-05                         |
| PA0182    | FabG-like  | 11           | FabG homolog, function unknown                                                           | 1.00                        | 1.00                       | 141.00                     | 28.00                   | 1.00                                  | 0.00                          | 4.13                             | 2.05                     | 5.74E-06                    | 2.86E-05                         |
| PA0249    |            | 7            | Predicted GNAT acetyltransferase                                                         | 1.00                        | 1.00                       | 551.00                     | 328.00                  | 1.00                                  | 0.00                          | 4.13                             | 2.05                     | 5.74E-06                    | 2.86E-05                         |
| PA0277    |            | 9            | HtpX Zn-dependent protease chaperone                                                     | 1.00                        | 1.00                       | 166.00                     | 95.00                   | 1.00                                  | 0.00                          | 4.13                             | 2.05                     | 5.74E-06                    | 2.86E-05                         |
| PA0278    | TauE/SafE  | 9            | Sulfite exporter TauE/SafE                                                               | 1.00                        | 1.00                       | 378.00                     | 363.00                  | 1.00                                  | 0.00                          | 4.13                             | 2.05                     | 5.74E-06                    | 2.86E-05                         |
| PA0281    | CysW       | 9            | Sulfate transporter CysW                                                                 | 1.00                        | 1.00                       | 106.00                     | 179.00                  | 1.00                                  | 0.00                          | 4.13                             | 2.05                     | 5.74E-06                    | 2.86E-05                         |
| PA0319    |            | 16           | Part of the <i>car</i> calcium responsive operon                                         | 1.00                        | 1.00                       | 192.00                     | 74.00                   | 1.00                                  | 0.00                          | 4.13                             | 2.05                     | 5.74E-06                    | 2.86E-05                         |
| PA0491    |            | 13           | Predicted LysR type transcriptional regulator of unknown function                        | 1.00                        | 1.00                       | 1581.00                    | 6208.00                 | 1.00                                  | 0.00                          | 4.13                             | 2.05                     | 5.74E-06                    | 2.86E-05                         |
| PA0765    | MucC       | 13           | Positive regulator for alginate biosynthesis                                             | 1.00                        | 1.00                       | 1338.00                    | 170.00                  | 1.00                                  | 0.00                          | 4.13                             | 2.05                     | 5.74E-06                    | 2.86E-05                         |
| PA0887    | AcsA       | 3            | Acetyl-CoA synthetase                                                                    | 1.00                        | 1.00                       | 126.00                     | 132.00                  | 1.00                                  | 0.00                          | 4.13                             | 2.05                     | 5.74E-06                    | 2.86E-05                         |
| PA0920    | MprF       | 16           | Bacterial defensin resistance protein (virulence factor); In operon with VirJ            | 1.00                        | 1.00                       | 113.00                     | 10.00                   | 1.00                                  | 0.00                          | 4.13                             | 2.05                     | 5.74E-06                    | 2.86E-05                         |
| PA1001    | PhnA       | 1            | Anthranilate synthase component I                                                        | 2.00                        | 2.00                       | 351.00                     | 164.00                  | 4.86                                  | 2.28                          | 4.13                             | 2.05                     | 1.41E-10                    | 2.16E-09                         |
| PA1141    |            | 13           | LysR-type transcriptional regulator, similar fold to OxyR                                | 1.00                        | 1.00                       | 187.00                     | 188.00                  | 1.00                                  | 0.00                          | 4.13                             | 2.05                     | 5.74E-06                    | 2.86E-05                         |
| PA1169    |            | 8            | Arachidonate 15-lipoxygenase                                                             | 1.00                        | 1.00                       | 175.00                     | 83.00                   | 1.00                                  | 0.00                          | 4.13                             | 2.05                     | 5.74E-06                    | 2.86E-05                         |
| PA1179    | PhoP       | 13           | Two-component response regulator PhoP                                                    | 1.00                        | 1.00                       | 91.00                      | 33.00                   | 1.00                                  | 0.00                          | 4.13                             | 2.05                     | 5.74E-06                    | 2.86E-05                         |
| PA1192    | TilS/MesJ  | 3            | Probable lysidine synthase TilS/MesJ                                                     | 1.00                        | 1.00                       | 679.00                     | 359.00                  | 1.00                                  | 0.00                          | 4.13                             | 2.05                     | 5.74E-06                    | 2.86E-05                         |
| PA1218    | PhyH       | 3            | Phytanoyl-CoA dioxygenase; binding of 2-oxoglutarate to the iron(II) containing enzyme   | 1.00                        | 1.00                       | 99.00                      | 29.00                   | 1.00                                  | 0.00                          | 4.13                             | 2.05                     | 5.74E-06                    | 2.86E-05                         |
| PA1247    | AprE       | 9            | Alkaline protease secretion protein AprE                                                 | 1.00                        | 1.00                       | 137.00                     | 44.00                   | 1.00                                  | 0.00                          | 4.13                             | 2.05                     | 5.74E-06                    | 2.86E-05                         |
| PA1455    | FliA       | 2            | Flagellar biosynthesis sigma factor                                                      | 1.00                        | 1.00                       | 1347.00                    | 407.00                  | 1.00                                  | 0.00                          | 4.13                             | 2.05                     | 5.74E-06                    | 2.86E-05                         |
| PA1510    | PGAP1-like | 8            | T6SS phospholipase effector - targets bacterial cells and induced ER/autophagy           | 1.00                        | 1.00                       | 172.00                     | 40.00                   | 1.00                                  | 0.00                          | 4.13                             | 2.05                     | 5.74E-06                    | 2.86E-05                         |
| PA1538    | CzcO       | 16           | Associated with the cation diffusion facilitator CzcD                                    | 1.00                        | 1.00                       | 173.00                     | 30.00                   | 1.00                                  | 0.00                          | 4.13                             | 2.05                     | 5.74E-06                    | 2.86E-05                         |
| PA1708    | PopB       | 8            | Translocator protein PopB, Type III Secretion System protein                             | 1.00                        | 1.00                       | 1453.00                    | 154.00                  | 1.00                                  | 0.00                          | 4.13                             | 2.05                     | 5.74E-06                    | 2.86E-05                         |
| PA1758    | PabB       | 3            | Para-aminobenzoate synthase (chorismate metabolism)                                      | 1.00                        | 1.00                       | 108.00                     | 65.00                   | 1.00                                  | 0.00                          | 4.13                             | 2.05                     | 5.74E-06                    | 2.86E-05                         |
| PA1941    |            | 16           | Predicted cytochrome                                                                     | 3.00                        | 3.00                       | 1244.00                    | 194.00                  | 4.86                                  | 2.28                          | 4.13                             | 2.05                     | 4.00E-15                    | 1.65E-13                         |
| PA1991    | ErcA       | 3            | Iron-containing alcohol dehydrogenase                                                    | 1.00                        | 1.00                       | 275.00                     | 48.00                   | 1.00                                  | 0.00                          | 4.13                             | 2.05                     | 5.74E-06                    | 2.86E-05                         |
| PA2349    |            | 9            | D-methionine transport system operon                                                     | 1.00                        | 1.00                       | 77.00                      | 59.00                   | 1.00                                  | 0.00                          | 4.13                             | 2.05                     | 5.74E-06                    | 2.86E-05                         |
| PA2464    | FoxB       | 16           | FoxB siderophore operon                                                                  | 1.00                        | 1.00                       | 412.00                     | 529.00                  | 1.00                                  | 0.00                          | 4.13                             | 2.05                     | 5.74E-06                    | 2.86E-05                         |
| PA2708    |            | 16           | Unknown but contains a DUF748                                                            | 1.00                        | 1.00                       | 346.00                     | 407.00                  | 1.00                                  | 0.00                          | 4.13                             | 2.05                     | 5.74E-06                    | 2.86E-05                         |
| PA2813    | GST        | 10           | Glutathione S-transferase                                                                | 1.00                        | 1.00                       | 1011.00                    | 737.00                  | 1.00                                  | 0.00                          | 4.13                             | 2.05                     | 5.74E-06                    | 2.86E-05                         |
| PA2843    | DAHP synth | 3            | Chorismate synthesis (catalyzes first step)                                              | 1.00                        | 1.00                       | 195.00                     | 110.00                  | 1.00                                  | 0.00                          | 4.13                             | 2.05                     | 5.74E-06                    | 2.86E-05                         |
| PA2896    | SbrR/SbrI  | 2            | Sigma and anti-sigma factor that regulate biofilms and motility                          | 1.00                        | 1.00                       | 297.00                     | 64.00                   | 1.00                                  | 0.00                          | 4.13                             | 2.05                     | 5.74E-06                    | 2.86E-05                         |
| PA2902    |            | 16           | WG repeat containing protein                                                             | 1.00                        | 1.00                       | 248.00                     | 134.00                  | 1.00                                  | 0.00                          | 4.13                             | 2.05                     | 5.74E-06                    | 2.86E-05                         |

|        |       |    |                                                                           |       |       |          |          |      |      |      |      |          |          |
|--------|-------|----|---------------------------------------------------------------------------|-------|-------|----------|----------|------|------|------|------|----------|----------|
| PA2925 | HisM  | 9  | Histidine transporter permease HisM                                       | 1.00  | 1.00  | 231.00   | 48.00    | 1.00 | 0.00 | 4.13 | 2.05 | 5.74E-06 | 2.86E-05 |
| PA3061 | PelD  | 13 | Cyclic-di-GMP binding, regulation of polysaccharide                       | 2.00  | 2.00  | 918.00   | 434.00   | 4.86 | 2.28 | 4.13 | 2.05 | 1.41E-10 | 2.16E-09 |
| PA3218 |       | 16 | protein of unknown function                                               | 1.00  | 1.00  | 400.00   | 185.00   | 1.00 | 0.00 | 4.13 | 2.05 | 5.74E-06 | 2.86E-05 |
| PA3349 | CheW  | 2  | Chemotaxis protein                                                        | 1.00  | 1.00  | 691.00   | 62.00    | 1.00 | 0.00 | 4.13 | 2.05 | 5.74E-06 | 2.86E-05 |
| PA3390 |       | 3  | ABM domain protein                                                        | 1.00  | 1.00  | 6406.00  | 1804.00  | 1.00 | 0.00 | 4.13 | 2.05 | 5.74E-06 | 2.86E-05 |
| PA3517 | PurB  | 3  | Adenylosuccinate lyase, purine metabolism                                 | 1.00  | 1.00  | 555.00   | 11.00    | 1.00 | 0.00 | 4.13 | 2.05 | 5.74E-06 | 2.86E-05 |
| PA3641 |       | 9  | Predicted glycine transporter                                             | 1.00  | 1.00  | 545.00   | 1402.00  | 1.00 | 0.00 | 4.13 | 2.05 | 5.74E-06 | 2.86E-05 |
| PA3765 |       | 16 | DUF2239 domain - protein function is unknown                              | 1.00  | 1.00  | 93.00    | 108.00   | 1.00 | 0.00 | 4.13 | 2.05 | 5.74E-06 | 2.86E-05 |
| PA4137 | OprD  | 9  | Porin                                                                     | 1.00  | 1.00  | 430.00   | 994.00   | 1.00 | 0.00 | 4.13 | 2.05 | 5.74E-06 | 2.86E-05 |
| PA4187 |       | 9  | Predicted sugar major facilitator superfamily (MFS) transporter           | 1.00  | 1.00  | 183.00   | 91.00    | 1.00 | 0.00 | 4.13 | 2.05 | 5.74E-06 | 2.86E-05 |
| PA4348 |       | 10 | Predicted beta lactamase AmpC (PA4347) and FprA homolog (PA4348)          | 1.00  | 1.00  | 145.00   | 243.00   | 1.00 | 0.00 | 4.13 | 2.05 | 5.74E-06 | 2.86E-05 |
| PA4352 |       | 13 | Anaerobic energy stress protein/Anr regulated                             | 1.00  | 1.00  | 499.00   | 32.00    | 1.00 | 0.00 | 4.13 | 2.05 | 5.74E-06 | 2.86E-05 |
| PA4516 |       | 16 | Hypothetical protein with Sel1-like repeat sequences                      | 1.00  | 1.00  | 740.00   | 52.00    | 1.00 | 0.00 | 4.13 | 2.05 | 5.74E-06 | 2.86E-05 |
| PA4613 | KatB  | 10 | Catalase regulated by OxyR                                                | 1.00  | 1.00  | 229.00   | 173.00   | 1.00 | 0.00 | 4.13 | 2.05 | 5.74E-06 | 2.86E-05 |
| PA4724 | GluQ  | 7  | Glutamyl-Q tRNA(Asp) synthetase                                           | 1.00  | 1.00  | 67.00    | 13.00    | 1.00 | 0.00 | 4.13 | 2.05 | 5.74E-06 | 2.86E-05 |
| PA4769 | Fur   | 13 | Ferric uptake regulator                                                   | 1.00  | 1.00  | 325.00   | 601.00   | 1.00 | 0.00 | 4.13 | 2.05 | 5.74E-06 | 2.86E-05 |
| PA4802 |       | 3  | Predicted amidohydrolase                                                  | 1.00  | 1.00  | 169.00   | 103.00   | 1.00 | 0.00 | 4.13 | 2.05 | 5.74E-06 | 2.86E-05 |
| PA4804 | PotE  | 15 | Putrescine export                                                         | 1.00  | 1.00  | 169.00   | 76.00    | 1.00 | 0.00 | 4.13 | 2.05 | 5.74E-06 | 2.86E-05 |
| PA4904 | VanA  | 3  | Vanillate O-demethylase oxygenase                                         | 1.00  | 1.00  | 125.00   | 73.00    | 1.00 | 0.00 | 4.13 | 2.05 | 5.74E-06 | 2.86E-05 |
| PA4905 | VanB  | 3  | Vanillate O-demethylase                                                   | 1.00  | 1.00  | 209.00   | 130.00   | 1.00 | 0.00 | 4.13 | 2.05 | 5.74E-06 | 2.86E-05 |
| PA4908 |       | 3  | Ornithine cyclodeaminase                                                  | 1.00  | 1.00  | 357.00   | 138.00   | 1.00 | 0.00 | 4.13 | 2.05 | 5.74E-06 | 2.86E-05 |
| PA4919 | PcnB1 | 3  | NAD salvage pathway                                                       | 1.00  | 1.00  | 294.00   | 259.00   | 1.00 | 0.00 | 4.13 | 2.05 | 5.74E-06 | 2.86E-05 |
| PA5093 | HutH  | 3  | Histidine/phenylalanine ammonia- lyase                                    | 1.00  | 1.00  | 416.00   | 120.00   | 1.00 | 0.00 | 4.13 | 2.05 | 5.74E-06 | 2.86E-05 |
| PA5113 |       | 16 | Hypothetical protein (DUF3999)                                            | 1.00  | 1.00  | 541.00   | 413.00   | 1.00 | 0.00 | 4.13 | 2.05 | 5.74E-06 | 2.86E-05 |
| PA5307 |       | 9  | Dicarboxylate transport                                                   | 1.00  | 1.00  | 170.00   | 217.00   | 1.00 | 0.00 | 4.13 | 2.05 | 5.74E-06 | 2.86E-05 |
| PA5348 |       | 13 | HU-IHF histone-like DNA binding protein                                   | 1.00  | 1.00  | 2020.00  | 3828.00  | 1.00 | 0.00 | 4.13 | 2.05 | 5.74E-06 | 2.86E-05 |
| PA5378 | CbcX  | 16 | Glycine/betaine transport                                                 | 1.00  | 1.00  | 471.00   | 209.00   | 1.00 | 0.00 | 4.13 | 2.05 | 5.74E-06 | 2.86E-05 |
| PA5382 |       | 13 | Predicted transcriptional regulator                                       | 1.00  | 1.00  | 815.00   | 160.00   | 1.00 | 0.00 | 4.13 | 2.05 | 5.74E-06 | 2.86E-05 |
| PA5401 |       | 9  | ABC-type proline/glycine betaine transport system (periplasmic component) | 1.00  | 1.00  | 154.00   | 163.00   | 1.00 | 0.00 | 4.13 | 2.05 | 5.74E-06 | 2.86E-05 |
| PA5434 | Mtr   | 9  | Tryptophan permease                                                       | 1.00  | 1.00  | 154.00   | 317.00   | 1.00 | 0.00 | 4.13 | 2.05 | 5.74E-06 | 2.86E-05 |
| PA5477 |       | 16 | Unknown function, contains DUF2070 and DUF2914 domains                    | 1.00  | 1.00  | 1528.00  | 241.00   | 1.00 | 0.00 | 4.13 | 2.05 | 5.74E-06 | 2.86E-05 |
| PA5517 |       | 16 | Hypothetical protein                                                      | 1.00  | 1.00  | 305.00   | 25.00    | 1.00 | 0.00 | 4.13 | 2.05 | 5.74E-06 | 2.86E-05 |
| PA5542 |       | 16 | Zn2+-dependent imipenemase                                                | 1.00  | 1.00  | 115.00   | 45.00    | 1.00 | 0.00 | 4.13 | 2.05 | 5.74E-06 | 2.86E-05 |
| PA0463 | CreB  | 13 | Two-component response regulator CreB                                     | 1.00  | 1.00  | 62.00    | 227.00   | 1.00 | 0.00 | 3.94 | 1.98 | 1.38E-05 | 5.46E-05 |
| PA0328 |       | 16 | Putative peptidase                                                        | 1.00  | 1.00  | 58.00    | 124.00   | 1.00 | 0.00 | 3.69 | 1.88 | 4.37E-05 | 1.72E-04 |
| PA0652 | Vfr   | 13 | Vfr (virulence factor regulator of Type III secretion); c-AMP regulated   | 1.00  | 1.00  | 58.00    | 71.00    | 1.00 | 0.00 | 3.69 | 1.88 | 4.37E-05 | 1.72E-04 |
| PA0511 | NirJ  | 4  | Heme d1 biosynthesis protein                                              | 1.00  | 1.00  | 56.00    | 352.00   | 1.00 | 0.00 | 3.56 | 1.83 | 7.75E-05 | 8.60E-05 |
| PA3732 |       | 16 | Hypothetical protein (DUF2170)                                            | 1.00  | 1.00  | 56.00    | 105.00   | 1.00 | 0.00 | 3.56 | 1.83 | 7.75E-05 | 8.60E-05 |
| PA5219 | AraJ  | 9  | AraJ (arabinose efflux transporter)                                       | 1.00  | 1.00  | 52.00    | 22.00    | 1.00 | 0.00 | 3.31 | 1.72 | 2.40E-04 | 2.65E-04 |
| PA2661 |       | 8  | Hypothetical protein in operon with Patatin-like phospholipase (PA2660)   | 1.00  | 1.00  | 49.00    | 114.00   | 1.00 | 0.00 | 3.11 | 1.64 | 5.54E-04 | 6.11E-04 |
| PA2960 | PilZ  | 2  | Type 4 fimbrial biogenesis protein                                        | 6.00  | 8.00  | 2573.00  | 2197.00  | 3.65 | 1.87 | 3.10 | 1.63 | 0.00E+00 | 0.00E+00 |
| PA1140 |       | 3  | Glyoxylate-induced protein; PDB code: 1sq4                                | 1.00  | 1.00  | 48.00    | 139.00   | 1.00 | 0.00 | 3.05 | 1.61 | 7.30E-04 | 8.04E-04 |
| PA2755 |       | 8  | Ecotin; serine protease inhibitor, protects from neutrophil elastase      | 1.00  | 1.00  | 48.00    | 17.00    | 1.00 | 0.00 | 3.05 | 1.61 | 7.30E-04 | 8.04E-04 |
| PA4362 |       | 9  | Sugar transport operon                                                    | 1.00  | 1.00  | 47.00    | 44.00    | 1.00 | 0.00 | 2.99 | 1.58 | 9.60E-04 | 1.05E-03 |
| PA5441 |       | 16 | Hypothetical protein                                                      | 1.00  | 1.00  | 44.00    | 28.00    | 1.00 | 0.00 | 2.80 | 1.48 | 2.16E-03 | 2.37E-03 |
| PA2762 |       | 16 | Cupin family protein, possible ring-cleaving dioxygenase                  | 2.00  | 3.00  | 658.00   | 310.00   | 3.24 | 1.70 | 2.75 | 1.46 | 1.79E-07 | 9.04E-07 |
| PA5042 | PilO  | 2  | Type 4 fimbrial biogenesis protein                                        | 8.00  | 12.00 | 58691.00 | 10412.00 | 3.24 | 1.70 | 2.75 | 1.46 | 0.00E+00 | 0.00E+00 |
| PA1818 | IdcA  | 3  | Lysine-specific pyridoxal 5'-phosphate (PLP)-dependent carboxylase        | 1.00  | 1.00  | 43.00    | 18.00    | 1.00 | 0.00 | 2.73 | 1.45 | 2.82E-03 | 3.10E-03 |
| PA3234 | ActP  | 9  | Acetate permease (predicted)                                              | 1.00  | 1.00  | 43.00    | 23.00    | 1.00 | 0.00 | 2.73 | 1.45 | 2.82E-03 | 3.10E-03 |
| PA4619 |       | 3  | Predicted iron/heme-binding cytochrome                                    | 2.00  | 3.00  | 224.00   | 79.00    | 3.24 | 1.70 | 2.73 | 1.45 | 2.31E-07 | 1.16E-06 |
| PA5040 | PilQ  | 2  | Type 4 fimbrial biogenesis outer membrane protein                         | 47.00 | 71.00 | 54612.00 | 62315.00 | 3.22 | 1.69 | 2.58 | 1.37 | 0.00E+00 | 0.00E+00 |
| PA0535 | DnaE  | 5  | DnaE (DNA polymerase III alpha subunit)                                   | 2.00  | 2.00  | 232.00   | 469.00   | 4.86 | 2.28 | 2.45 | 1.29 | 2.27E-04 | 2.51E-04 |
| PA5041 | PilP  | 2  | Type 4 fimbrial biogenesis protein                                        | 8.00  | 13.00 | 5957.00  | 6871.00  | 2.99 | 1.58 | 2.43 | 1.28 | 0.00E+00 | 0.00E+00 |
| PA0495 | AtzF  | 3  | Allophanate hydrolase subunit 1                                           | 1.00  | 1.00  | 38.00    | 38.00    | 1.00 | 0.00 | 2.42 | 1.27 | 1.04E-02 | 1.11E-02 |

|        |           |    |                                                                                   |       |       |          |          |      |      |      |      |          |          |
|--------|-----------|----|-----------------------------------------------------------------------------------|-------|-------|----------|----------|------|------|------|------|----------|----------|
| PA3716 |           | 16 | Protein of unknown function (contains a WG repeat)                                | 1.00  | 1.00  | 36.00    | 13.00    | 1.00 | 0.00 | 2.29 | 1.19 | 1.72E-02 | 1.82E-02 |
| PA5043 | PilN      | 2  | Type 4 fimbrial biogenesis protein                                                | 6.00  | 10.00 | 2363.00  | 4345.00  | 2.92 | 1.54 | 2.19 | 1.13 | 1.30E-12 | 4.60E-11 |
| PA3620 | MutS      | 10 | DNA mismatch repair protein MutS                                                  | 2.00  | 1.00  | 34.00    | 17.00    | 9.72 | 3.28 | 2.16 | 1.11 | 2.81E-02 | 2.97E-02 |
| PA5044 | PilM      | 2  | Type 4 fimbrial biogenesis protein                                                | 17.00 | 31.00 | 14686.00 | 15265.00 | 2.67 | 1.41 | 2.11 | 1.07 | 0.00E+00 | 0.00E+00 |
| PA0968 | FadM      | 4  | acetyl-CoA thioesterase (Tol receptor operon regulated by iron)                   | 1.00  | 1.00  | 33.00    | 142.00   | 1.00 | 0.00 | 2.10 | 1.07 | 3.58E-02 | 3.78E-02 |
| PA3840 |           | 7  | rRNA (adenine-N6-)-methyltransferase activity                                     | 1.00  | 1.00  | 33.00    | 176.00   | 1.00 | 0.00 | 2.10 | 1.07 | 3.58E-02 | 3.78E-02 |
| PA0027 |           | 3  | Phosphatidylethanolamine (PE) lipid taxis system (3' to HemF operon)              | 1.00  | 2.00  | 303.00   | 77.00    | 2.43 | 1.28 | 2.07 | 1.05 | 3.73E-03 | 4.07E-03 |
| PA0106 | CoxA      | 3  | Cytochrome C oxidase subunit I                                                    | 1.00  | 2.00  | 325.00   | 49.00    | 2.43 | 1.28 | 2.07 | 1.05 | 3.73E-03 | 4.07E-03 |
| PA0260 | Tle3      | 8  | T6SS putative lipase; $\alpha$ - $\beta$ hydrolase domain                         | 1.00  | 2.00  | 172.00   | 1025.00  | 2.43 | 1.28 | 2.07 | 1.05 | 3.73E-03 | 4.07E-03 |
| PA0268 |           | 13 | Aspartate amidotransferase superfamily regulator                                  | 1.00  | 2.00  | 130.00   | 73.00    | 2.43 | 1.28 | 2.07 | 1.05 | 3.73E-03 | 4.07E-03 |
| PA0464 | CreC      | 13 | Two-component histidine kinase CreC                                               | 1.00  | 2.00  | 182.00   | 191.00   | 2.43 | 1.28 | 2.07 | 1.05 | 3.73E-03 | 4.07E-03 |
| PA0509 | NirN      | 3  | Heme d1 biosynthesis protein                                                      | 1.00  | 2.00  | 151.00   | 30.00    | 2.43 | 1.28 | 2.07 | 1.05 | 3.73E-03 | 4.07E-03 |
| PA0625 | HylD      | 9  | Type I secretion system protein                                                   | 1.00  | 2.00  | 490.00   | 276.00   | 2.43 | 1.28 | 2.07 | 1.05 | 3.73E-03 | 4.07E-03 |
| PA0792 | PrpD      | 3  | Aconitase activity                                                                | 1.00  | 2.00  | 524.00   | 137.00   | 2.43 | 1.28 | 2.07 | 1.05 | 3.73E-03 | 4.07E-03 |
| PA0820 |           | 3  | HNH nuclease or endonuclease                                                      | 1.00  | 2.00  | 933.00   | 234.00   | 2.43 | 1.28 | 2.07 | 1.05 | 3.73E-03 | 4.07E-03 |
| PA0845 | CerN      | 8  | Hydrolyzes ceramide to generate sphingosine and fatty acid; possible exotoxin     | 1.00  | 2.00  | 7349.00  | 15601.00 | 2.43 | 1.28 | 2.07 | 1.05 | 3.73E-03 | 4.07E-03 |
| PA1069 |           | 16 | Hypothetical protein                                                              | 1.00  | 2.00  | 274.00   | 106.00   | 2.43 | 1.28 | 2.07 | 1.05 | 3.73E-03 | 4.07E-03 |
| PA2670 |           | 16 | Hypothetical protein                                                              | 1.00  | 2.00  | 129.00   | 43.00    | 2.43 | 1.28 | 2.07 | 1.05 | 3.73E-03 | 4.07E-03 |
| PA2761 |           | 16 | Predicted glycine/betaine transporter                                             | 1.00  | 2.00  | 218.00   | 69.00    | 2.43 | 1.28 | 2.07 | 1.05 | 3.73E-03 | 4.07E-03 |
| PA3053 | MhpC      | 3  | Flavoenzyme catalyzing an aromatic hydroxylation and a ring-cleavage reaction     | 1.00  | 2.00  | 249.00   | 313.00   | 2.43 | 1.28 | 2.07 | 1.05 | 3.73E-03 | 4.07E-03 |
| PA3305 |           | 16 | Hypothetical protein                                                              | 1.00  | 2.00  | 109.00   | 144.00   | 2.43 | 1.28 | 2.07 | 1.05 | 3.73E-03 | 4.07E-03 |
| PA3340 | FimV-like | 2  | Twitching motility                                                                | 1.00  | 2.00  | 98.00    | 168.00   | 2.43 | 1.28 | 2.07 | 1.05 | 3.73E-03 | 4.07E-03 |
| PA3710 | Beta      | 8  | Choline dehydrogenase; betaine biosynthesis from choline                          | 1.00  | 2.00  | 1982.00  | 3686.00  | 2.43 | 1.28 | 2.07 | 1.05 | 3.73E-03 | 4.07E-03 |
| PA3898 |           | 13 | AraC-type transcriptional regulator                                               | 1.00  | 2.00  | 133.00   | 335.00   | 2.43 | 1.28 | 2.07 | 1.05 | 3.73E-03 | 4.07E-03 |
| PA4026 |           | 3  | Gcn5-related N-acetyltransferase (GNAT)                                           | 1.00  | 2.00  | 4897.00  | 580.00   | 2.43 | 1.28 | 2.07 | 1.05 | 3.73E-03 | 4.07E-03 |
| PA4113 | AraJ      | 9  | Putative arabinose efflux transporter                                             | 1.00  | 2.00  | 574.00   | 684.00   | 2.43 | 1.28 | 2.07 | 1.05 | 3.73E-03 | 4.07E-03 |
| PA4625 | CrdA      | 13 | c-di-GMP binding, coordinates extracellular matrix, positively regulates biofilms | 8.00  | 16.00 | 7149.00  | 2826.00  | 2.43 | 1.28 | 2.07 | 1.05 | 0.00E+00 | 0.00E+00 |
| PA4689 | MlaD      | 8  | Lipid transporter component                                                       | 3.00  | 6.00  | 560.00   | 961.00   | 2.43 | 1.28 | 2.07 | 1.05 | 5.07E-07 | 2.53E-06 |
| PA4733 | AcsB      | 3  | Acetyl-CoA synthetase                                                             | 1.00  | 2.00  | 120.00   | 105.00   | 2.43 | 1.28 | 2.07 | 1.05 | 3.73E-03 | 4.07E-03 |
| PA4913 |           | 9  | Probable outer membrane amino acid transporter binding protein                    | 1.00  | 2.00  | 76.00    | 1052.00  | 2.43 | 1.28 | 2.07 | 1.05 | 3.73E-03 | 4.07E-03 |
| PA4925 | MscS      | 9  | Small-conductance mechanosensitive channel protein                                | 1.00  | 2.00  | 712.00   | 61.00    | 2.43 | 1.28 | 2.07 | 1.05 | 3.73E-03 | 4.07E-03 |
| PA3641 | AruH      | 3  | L-Arginine catabolism; pyruvate transaminase                                      | 1.00  | 2.00  | 3187.00  | 3288.00  | 2.43 | 1.28 | 2.07 | 1.05 | 3.73E-03 | 4.07E-03 |
| PA5058 | PhaC      | 3  | Poly(3-hydroxyalkanoic acid) synthase 2                                           | 1.00  | 2.00  | 312.00   | 231.00   | 2.43 | 1.28 | 2.07 | 1.05 | 3.73E-03 | 4.07E-03 |
| PA5217 | PotD      | 15 | PotD; Fe3+ and polyamine ABC transporter periplasmic binding protein              | 1.00  | 2.00  | 68.00    | 121.00   | 2.43 | 1.28 | 2.07 | 1.05 | 3.73E-03 | 4.07E-03 |
| PA5412 |           | 16 | Hypothetical protein                                                              | 1.00  | 2.00  | 820.00   | 107.00   | 2.43 | 1.28 | 2.07 | 1.05 | 3.73E-03 | 4.07E-03 |
| PA4587 | CcpR      | 3  | Cytochrome c551 peroxidase precursor                                              | 1.00  | 1.00  | 32.00    | 583.00   | 1.00 | 0.00 | 2.03 | 1.02 | 4.54E-02 | 4.77E-02 |
| PA4607 |           | 16 | DUF3015 containing protein of unknown function                                    | 1.00  | 1.00  | 32.00    | 248.00   | 1.00 | 0.00 | 2.03 | 1.02 | 4.54E-02 | 4.77E-02 |
| PA4551 | PilV      | 2  | Type 4 fimbrial biogenesis protein                                                | 7.00  | 12.00 | 2631.00  | 4472.00  | 2.84 | 1.50 | 2.00 | 1.00 | 1.37E-11 | 2.29E-10 |
| PA5523 | HemL-like | 4  | HemL/ArgD, pyridoxal phosphate binding                                            | 1.00  | 2.00  | 63.00    | 146.00   | 2.43 | 1.28 | 2.00 | 1.00 | 5.78E-03 | 6.17E-03 |
| PA4675 | ChtA      | 4  | Xenosiderophore transporter (TonB-dependent)                                      | 2.00  | 3.00  | 251.00   | 210.00   | 3.24 | 1.70 | 1.99 | 0.99 | 8.04E-04 | 8.84E-04 |
| PA2151 |           | 3  | Zinc-dependent alcohol dehydrogenase                                              | 1.00  | 1.00  | 31.00    | 50.00    | 1.00 | 0.00 | 1.97 | 0.98 | 5.73E-02 | 6.01E-02 |
| PA0101 |           | 16 | HEAT domain repeats                                                               | 1.00  | 1.00  | 30.00    | 23.00    | 1.00 | 0.00 | 1.91 | 0.93 | 7.21E-02 | 7.56E-02 |
| PA4499 | PsdR      | 13 | Regulates dipeptide, aminolevulinic acid and heme transport                       | 1.00  | 1.00  | 30.00    | 723.00   | 1.00 | 0.00 | 1.91 | 0.93 | 7.21E-02 | 7.56E-02 |
| PA5233 | FliL      | 2  | Flagellar basal body protein FliL                                                 | 1.00  | 1.00  | 29.00    | 171.00   | 1.00 | 0.00 | 1.84 | 0.88 | 9.03E-02 | 9.44E-02 |
| PA4099 | OprB      | 9  | Carbohydrate-selective porin (glucose activated)                                  | 1.00  | 1.00  | 28.00    | 261.00   | 1.00 | 0.00 | 1.78 | 0.83 | 1.13E-01 | 1.18E-01 |
| PA2252 |           | 9  | Predicted AGCS sodium/alanine/glycine symporter                                   | 1.00  | 2.00  | 54.00    | 62.00    | 2.43 | 1.28 | 1.72 | 0.78 | 3.67E-02 | 3.88E-02 |
| PA2563 |           | 9  | Predicted sulfate transporter                                                     | 1.00  | 1.00  | 27.00    | 30.00    | 1.00 | 0.00 | 1.72 | 0.78 | 1.40E-01 | 1.46E-01 |

|        |       |    |                                                                                 |       |        |           |          |      |      |      |      |          |          |
|--------|-------|----|---------------------------------------------------------------------------------|-------|--------|-----------|----------|------|------|------|------|----------|----------|
| PA5155 |       | 9  | Predicted amino acid (lysine/arginine/ornithine/histidine/octopine) transporter | 1.00  | 1.00   | 26.00     | 453.00   | 1.00 | 0.00 | 1.65 | 0.72 | 1.72E-01 | 1.78E-01 |
| PA5181 |       | 10 | Predicted molybdenum ion / Fe-sulfur cluster binding protein                    | 1.00  | 1.00   | 26.00     | 272.00   | 1.00 | 0.00 | 1.65 | 0.72 | 1.72E-01 | 1.78E-01 |
| PA4526 | PilB  | 2  | Type 4 fimbrial biogenesis protein                                              | 22.00 | 52.00  | 23425.00  | 46461.00 | 2.06 | 1.04 | 1.62 | 0.70 | 0.00E+00 | 0.00E+00 |
| PA0525 | NorD  | 3  | Denitrification protein                                                         | 1.00  | 2.00   | 50.00     | 47.00    | 2.43 | 1.28 | 1.59 | 0.67 | 7.73E-02 | 8.09E-02 |
| PA1859 |       | 13 | LysR-type transcriptional regulator                                             | 1.00  | 1.00   | 25.00     | 190.00   | 1.00 | 0.00 | 1.59 | 0.67 | 2.12E-01 | 2.19E-01 |
| PA2474 |       | 3  | Putative MetA-pathway of phenol degradation (in operon with GST)                | 1.00  | 1.00   | 23.00     | 42.00    | 1.00 | 0.00 | 1.46 | 0.55 | 3.13E-01 | 3.22E-01 |
| PA4227 | PchR  | 4  | Binds and regulates pyochelin siderophore synthesis and uptake                  | 1.00  | 1.00   | 23.00     | 42.00    | 1.00 | 0.00 | 1.46 | 0.55 | 3.13E-01 | 3.22E-01 |
| PA4554 | PilY1 | 2  | Type 4 fimbrial biogenesis protein                                              | 52.00 | 132.00 | 82011.00  | 40384.00 | 1.91 | 0.94 | 1.46 | 0.54 | 0.00E+00 | 0.00E+00 |
| PA1410 | PotD  | 15 | Spermidine/putrescine-binding periplasmic protein                               | 1.00  | 1.00   | 22.00     | 59.00    | 1.00 | 0.00 | 1.40 | 0.48 | 3.77E-01 | 3.86E-01 |
| PA3877 | Nark1 | 3  | Nitrite metabolism operon                                                       | 1.00  | 1.00   | 22.00     | 124.00   | 1.00 | 0.00 | 1.40 | 0.48 | 3.77E-01 | 3.86E-01 |
| PA0067 | PriC  | 3  | Oligopeptidase                                                                  | 1.00  | 3.00   | 530.00    | 286.00   | 1.62 | 0.70 | 1.38 | 0.46 | 1.45E-01 | 1.51E-01 |
| PA0158 | TriC  | 9  | Detergent/antibiotic efflux pump                                                | 1.00  | 3.00   | 134.00    | 130.00   | 1.62 | 0.70 | 1.38 | 0.46 | 1.45E-01 | 1.51E-01 |
| PA0266 | GabT  | 15 | Arginine degradation                                                            | 1.00  | 3.00   | 300.00    | 167.00   | 1.62 | 0.70 | 1.38 | 0.46 | 1.45E-01 | 1.51E-01 |
| PA1027 | AmaB  | 3  | Aldehyde dehydrogenase                                                          | 1.00  | 3.00   | 151.00    | 164.00   | 1.62 | 0.70 | 1.38 | 0.46 | 1.45E-01 | 1.51E-01 |
| PA1383 |       | 16 | Hypothetical protein                                                            | 1.00  | 3.00   | 561.00    | 90.00    | 1.62 | 0.70 | 1.38 | 0.46 | 1.45E-01 | 1.51E-01 |
| PA4514 | PiuA  | 4  | Outer membrane receptor for iron transport                                      | 1.00  | 3.00   | 71.00     | 132.00   | 1.62 | 0.70 | 1.38 | 0.46 | 1.45E-01 | 1.51E-01 |
| PA4985 | PotD  | 15 | Fe3+ and/or spermidine/putrescine ABC transporter periplasmic binding protein   | 1.00  | 3.00   | 456.00    | 197.00   | 1.62 | 0.70 | 1.38 | 0.46 | 1.45E-01 | 1.51E-01 |
| PA5022 | MscK  | 9  | Small-conductance mechanosensitive channel protein                              | 1.00  | 3.00   | 313.00    | 563.00   | 1.62 | 0.70 | 1.38 | 0.46 | 1.45E-01 | 1.51E-01 |
| PA5367 | PstA  | 9  | Membrane protein component of ABC phosphate transporter                         | 1.00  | 3.00   | 89.00     | 548.00   | 1.62 | 0.70 | 1.38 | 0.46 | 1.45E-01 | 1.51E-01 |
| PA3805 | PilF  | 2  | Type 4 fimbrial biogenesis protein                                              | 11.00 | 32.00  | 6850.00   | 12411.00 | 1.67 | 0.74 | 1.32 | 0.40 | 4.45E-05 | 1.73E-04 |
| PA4163 |       | 7  | Predicted Asp-tRNAAsn/Glu-tRNA Gln amidotransferase A subunit                   | 1.00  | 1.00   | 20.00     | 69.00    | 1.00 | 0.00 | 1.27 | 0.35 | 5.34E-01 | 5.45E-01 |
| PA4986 |       | 3  | FAD-dependent oxidoreductase                                                    | 1.00  | 1.00   | 20.00     | 15.00    | 1.00 | 0.00 | 1.27 | 0.35 | 5.34E-01 | 5.45E-01 |
| PA5327 | SphC  | 3  | Sphingosine degradation / FAD-binding oxidoreductase                            | 1.00  | 1.00   | 20.00     | 19.00    | 1.00 | 0.00 | 1.27 | 0.35 | 5.34E-01 | 5.45E-01 |
| PA5372 | BetA  | 3  | Choline dehydrogenase; betaine biosynthesis from choline                        | 1.00  | 3.00   | 58.00     | 145.00   | 1.62 | 0.70 | 1.23 | 0.30 | 3.58E-01 | 3.68E-01 |
| PA5516 | PdxY  | 3  | Pyridoxamine kinase, salvage pathway of pyridoxal 5'-phosphate (PLP)            | 1.00  | 1.00   | 19.00     | 148.00   | 1.00 | 0.00 | 1.21 | 0.27 | 6.28E-01 | 6.39E-01 |
| PA4553 | PilX  | 2  | Type 4 fimbrial biogenesis protein                                              | 6.00  | 20.00  | 1555.00   | 4113.00  | 1.46 | 0.54 | 1.20 | 0.26 | 4.15E-02 | 4.37E-02 |
| PA0426 | MexB  | 9  | Resistance-Nodulation-cell Division (RND) multidrug efflux transporter          | 2.00  | 4.00   | 249.00    | 261.00   | 2.43 | 1.28 | 1.19 | 0.25 | 3.69E-01 | 3.79E-01 |
| PA0142 |       | 3  | 8-oxoguanine deaminase                                                          | 1.00  | 2.00   | 36.00     | 59.00    | 2.43 | 1.28 | 1.14 | 0.19 | 6.29E-01 | 6.39E-01 |
| PA1838 | CysI  | 3  | Sulfite reductase                                                               | 1.00  | 1.00   | 18.00     | 106.00   | 1.00 | 0.00 | 1.14 | 0.19 | 7.33E-01 | 7.42E-01 |
| PA1858 | StrB  | 3  | Streptomycin 3"- kinase                                                         | 1.00  | 1.00   | 18.00     | 84.00    | 1.00 | 0.00 | 1.14 | 0.19 | 7.33E-01 | 7.42E-01 |
| PA2591 | VqsR  | 1  | Quorum sensing regulator (N-acyl homoserine lactones)                           | 1.00  | 1.00   | 18.00     | 163.00   | 1.00 | 0.00 | 1.14 | 0.19 | 7.33E-01 | 7.42E-01 |
| PA2837 | OmpA  | 9  | Outer membrane efflux protein                                                   | 1.00  | 1.00   | 18.00     | 26.00    | 1.00 | 0.00 | 1.14 | 0.19 | 7.33E-01 | 7.42E-01 |
| PA3079 |       | 9  | Predicted efflux protein                                                        | 1.00  | 1.00   | 18.00     | 20.00    | 1.00 | 0.00 | 1.14 | 0.19 | 7.33E-01 | 7.42E-01 |
| PA4060 |       | 3  | S-adenosylmethionine-dependent methyltransferase                                | 1.00  | 1.00   | 18.00     | 220.00   | 1.00 | 0.00 | 1.14 | 0.19 | 7.33E-01 | 7.42E-01 |
| PA4528 | PilD  | 2  | Type 4 prepilin peptidase                                                       | 4.00  | 12.00  | 377.00    | 2589.00  | 1.62 | 0.70 | 1.14 | 0.19 | 2.53E-01 | 2.61E-01 |
| PA2492 | MexT  | 13 | Transcriptional regulator                                                       | 4.00  | 6.00   | 341515.00 | 40398.00 | 3.24 | 1.70 | 1.12 | 0.17 | 4.73E-01 | 4.82E-01 |
| PA4556 | PilE  | 2  | Type 4 fimbrial biogenesis protein                                              | 5.00  | 19.00  | 929.00    | 5911.00  | 1.28 | 0.36 | 1.09 | 0.12 | 3.59E-01 | 3.69E-01 |
| PA5449 | WbpX  | 3  | Glycosyltransferase                                                             | 1.00  | 2.00   | 33.00     | 102.00   | 2.43 | 1.28 | 1.05 | 0.07 | 8.66E-01 | 8.73E-01 |
| PA0301 | SpuE  | 15 | Spermidine/putrescine-binding periplasmic protein                               | 1.00  | 4.00   | 99.00     | 302.00   | 1.22 | 0.28 | 1.03 | 0.05 | 8.72E-01 | 8.77E-01 |
| PA4221 | FptA  | 4  | Fe(III)-pyochelin outer membrane receptor                                       | 2.00  | 5.00   | 105.00    | 639.00   | 1.94 | 0.96 | 1.03 | 0.04 | 8.70E-01 | 8.76E-01 |
| PA3241 | RssA  | 11 | Predicted phospholipase (patatin domain)                                        | 1.00  | 1.00   | 16.00     | 143.00   | 1.00 | 0.00 | 1.02 | 0.02 | 9.67E-01 | 9.68E-01 |
| PA3601 |       | 7  | 50S ribosomal protein L31                                                       | 1.00  | 1.00   | 16.00     | 636.00   | 1.00 | 0.00 | 1.02 | 0.02 | 9.67E-01 | 9.68E-01 |
| PA5047 |       | 16 | Putative Zn-dependent protease                                                  | 1.00  | 1.00   | 16.00     | 161.00   | 1.00 | 0.00 | 1.02 | 0.02 | 9.67E-01 | 9.68E-01 |
| PA4527 | PilC  | 2  | Pilin protein                                                                   | 10.00 | 35.00  | 5190.00   | 10851.00 | 1.39 | 0.47 | 1.01 | 0.01 | 9.07E-01 | 9.10E-01 |

\* Yellow highlight = genes used for validation in these studies.

Grey highlight = genes with p values below 0.05

\*\* PAO1 locus number

\*\*\* Category: 1 = Quorum sensing; 2= Adherence/Motility; 3 = Energy/Metabolism; 4 = Fe/Heme; 5 = DNA; 6 = RNA; 7 = Protein; 8 = Virulence; 9 = Transportation; 10 = Cellular stress; 11 = Fatty acids; 12 = Cell wall/Envelope; 13 = Regulation/Signal transduction; 14 = Phage; 15 = Polyamines; 16 = Unknown  
Based on manual annotation.

Table S1B. Met-Seq Enriched Promoters

| Gene ID* | Name      | Category** | Annotation                                          | AveUnique hits (treatment) | Ave. Unique hits (control) | Ave. Raw Reads (treatment) | Ave. Raw Read (control) | Ratio_ Insertions (Treatment / control) | Log2-fold Change (Insertions) | Ratio_reads (Treatment /control) | Log2-fold Change (reads) | p value (proportions_reads) | Adj. pvalue (proportions_reads) |
|----------|-----------|------------|-----------------------------------------------------|----------------------------|----------------------------|----------------------------|-------------------------|-----------------------------------------|-------------------------------|----------------------------------|--------------------------|-----------------------------|---------------------------------|
| PA4731   | PanD      | 7          | Aspartate 1-decarboxylase precursor                 | 1                          | 0                          | 53                         | 0                       | 15.83                                   | 3.98                          | 33.69                            | 5.07                     | 6.46E-09                    | 1.12E-06                        |
| PA0051   | PhzH      | 3          | Phenazine biosynthesis                              | 1                          | 1                          | 100                        | 248                     | 1.00                                    | 0.00                          | 4.13                             | 2.05                     | 5.74E-06                    | 1.10E-04                        |
| PA0155   | PcaR      | 13         | Aromatic compound degradation                       | 1                          | 1                          | 208                        | 72                      | 1.00                                    | 0.00                          | 4.13                             | 2.05                     | 5.74E-06                    | 1.10E-04                        |
| PA0473   | GST       | 10         | Glutathione-S-transferase                           | 1                          | 1                          | 207                        | 424                     | 1.00                                    | 0.00                          | 4.13                             | 2.05                     | 5.74E-06                    | 1.10E-04                        |
| PA0946   |           | 16         | Hypothetical                                        | 1                          | 1                          | 110                        | 97                      | 1.00                                    | 0.00                          | 4.13                             | 2.05                     | 5.74E-06                    | 1.10E-04                        |
| PA0990   |           | 3          | Nudix hydrolase                                     | 1                          | 1                          | 251                        | 42                      | 1.00                                    | 0.00                          | 4.13                             | 2.05                     | 5.74E-06                    | 1.10E-04                        |
| PA1750   | AroG1     | 3          | DHAP synthetase                                     | 1                          | 1                          | 68                         | 135                     | 1.00                                    | 0.00                          | 4.13                             | 2.05                     | 5.74E-06                    | 1.10E-04                        |
| PA1813   | GloB      | 10         | Hydroxyacylglutathione hydrolase                    | 1                          | 1                          | 187                        | 17                      | 1.00                                    | 0.00                          | 4.13                             | 2.05                     | 5.74E-06                    | 1.10E-04                        |
| PA1814   | KerV      | 3          | Methyltransferase                                   | 1                          | 1                          | 187                        | 17                      | 1.00                                    | 0.00                          | 4.13                             | 2.05                     | 5.74E-06                    | 1.10E-04                        |
| PA1943   | RimI      | 13         | Acetyltransferase                                   | 1                          | 1                          | 89                         | 30                      | 1.00                                    | 0.00                          | 4.13                             | 2.05                     | 5.74E-06                    | 1.10E-04                        |
| PA2548   |           | 12         | Periplasmic binding OmpA-like                       | 1                          | 1                          | 276                        | 342                     | 1.00                                    | 0.00                          | 4.13                             | 2.05                     | 5.74E-06                    | 1.10E-04                        |
| PA2897   | MocR-like | 13         | Transcription factor/PLP-dependent aminotransferase | 1                          | 1                          | 911                        | 92                      | 1.00                                    | 0.00                          | 4.13                             | 2.05                     | 5.74E-06                    | 1.10E-04                        |
| PA3340   | FimV      | 2          | Motility                                            | 1                          | 1                          | 543                        | 46                      | 1.00                                    | 0.00                          | 4.13                             | 2.05                     | 5.74E-06                    | 1.10E-04                        |
| PA4234   | Ssb       | 5          | Replication, single stranded DNA binding            | 1                          | 1                          | 65                         | 218                     | 1.00                                    | 0.00                          | 4.13                             | 2.05                     | 5.74E-06                    | 1.10E-04                        |
| PA4574   | YqhA      | 16         | Uncharacterized membrane protein                    | 1                          | 1                          | 584                        | 99                      | 1.00                                    | 0.00                          | 4.13                             | 2.05                     | 5.74E-06                    | 1.10E-04                        |
| PA4876   | OsmE      | 12         | Osmotically-inducible lipoprotein                   | 1                          | 1                          | 2113                       | 281                     | 1.00                                    | 0.00                          | 4.13                             | 2.05                     | 5.74E-06                    | 1.10E-04                        |
| PA5461   |           | 16         | Hypothetical; DUF2388                               | 1                          | 1                          | 191                        | 49                      | 1.00                                    | 0.00                          | 4.13                             | 2.05                     | 5.74E-06                    | 1.10E-04                        |
| PA5566   |           | 16         | Hypothetical                                        | 1                          | 1                          | 643                        | 42                      | 1.00                                    | 0.00                          | 4.13                             | 2.05                     | 5.74E-06                    | 1.10E-04                        |
| PA3921   | MalT      | 13         | Transcription factor                                | 1                          | 1                          | 43                         | 36                      | 1.00                                    | 0.00                          | 2.73                             | 1.45                     | 2.82E-03                    | 2.89E-03                        |
| PA3577   |           | 16         | Hypothetical                                        | 1                          | 1                          | 40                         | 22                      | 1.00                                    | 0.00                          | 2.54                             | 1.35                     | 6.21E-03                    | 6.21E-03                        |
| PA2754   | ElaB      | 7          | Membrane-anchored ribosome-binding protein          | 1                          | 2                          | 255                        | 154                     | 3.96                                    | 1.98                          | 2.07                             | 1.05                     | 3.73E-03                    | 3.79E-03                        |
| PA2755   | Eco       | 8          | Ecotin precursor                                    | 1                          | 2                          | 121                        | 65                      | 3.96                                    | 1.98                          | 2.07                             | 1.05                     | 3.73E-03                    | 3.79E-03                        |
| PA4524.1 |           | 7          | tRNA                                                | 1                          | 2                          | 1072                       | 3123                    | 3.96                                    | 1.98                          | 2.07                             | 1.05                     | 3.73E-03                    | 3.79E-03                        |

\* PAO1 locus number

\*\* Category: 1 = Quorum sensing; 2= Adherence/Motility; 3 = Energy/Metabolism; 4 = Fe/Heme; 5 = DNA; 6 = RNA; 7 = Protein; 8 = Virulence; 9 = Transportation; 10 = Cellular; 11= Fatty acids; 12 = Cell wall/Envelope; 13 = Regulation/Signal transduction; 14 = Phage; 15 = Polyamines; 16 = Unknown

Table S1C. Met-Seq Enriched sRNAs

| Gene ID*                | sRNA ID         | sRNA start_end  | sRNA length     | Intergenic start_end | Intergenic length | Name                                       | Category**                                          | Annotation                              | AveUnique hits (treatment) | Ave. Unique hits (control) | Ave. Raw Reads (treatment) | Ave. Raw Read (control) | Ratio_ Insertions (Treatment /control) | Log2-fold Change (Insertions) | Ratio_ reads (Treatment /control) | Log2-fold Change (reads) | pvalue (proportions_reads) | Adj. pvalue (proportions_reads) |
|-------------------------|-----------------|-----------------|-----------------|----------------------|-------------------|--------------------------------------------|-----------------------------------------------------|-----------------------------------------|----------------------------|----------------------------|----------------------------|-------------------------|----------------------------------------|-------------------------------|-----------------------------------|--------------------------|----------------------------|---------------------------------|
| PA5042                  | as223           | 5678557_5678652 | 96              | na                   | na                | <i>pilO</i>                                | 2                                                   | Type 4 fimbrial biogenesis protein PilO | 2                          | 2                          | 1527                       | 1818                    | 5.48                                   | 2.45                          | 4.13                              | 2.05                     | 1.41E-10                   | 5.29E-09                        |
| PA5058                  | as226           | 5699012_5699062 | 51              | na                   | na                | <i>phaC2</i>                               | 3                                                   | Poly(3-hydroxyalkanoic acid) synthase 2 | 1                          | 1                          | 312                        | 180                     | 1.00                                   | 0.00                          | 4.13                              | 2.05                     | 5.74E-06                   | 8.61E-05                        |
| PA2906_Pant272_Pant2907 | 3261207_3261426 | 114             | 3261186_3261521 | 335                  | <i>cobG</i>       | ?                                          | Colbamin biosynthesis (RNA regulation)              | 1                                       | 1                          | 65                         | 104                        | 1.00                    | 0.00                                   | 4.13                          | 2.05                              | 5.74E-06                 | 8.61E-05                   |                                 |
| PA3433_Pant317_Pant3434 | 3841795_3842086 | 292             | 3841738_3842273 | 535                  | ?                 | LysR-type TF/Transposase                   | ?                                                   | 1                                       | 1                          | 226                        | 175                        | 1.00                    | 0.00                                   | 4.13                          | 2.05                              | 5.74E-06                 | 8.61E-05                   |                                 |
| PA3993_Pant368_Pant3994 | 4474657_4474804 | 148             | 4474640_4474958 | 318                  | ?                 | Predicted alpha/beta hydrolase/Transposase | ?                                                   | 1                                       | 1                          | 85                         | 61                         | 1.00                    | 0.00                                   | 4.13                          | 2.05                              | 5.74E-06                 | 8.61E-05                   |                                 |
| PA3577_Pant335_Pant3578 | 4009052_4009156 | 105             | 4009052_4009541 | 491                  | <i>phzC/F</i>     | ?                                          | Shikimate/chorismate biosynthesis pathway           | 1                                       | 1                          | 40                         | 22                         | 1.00                    | 0.00                                   | 2.54                          | 1.35                              | 6.21E-03                 | 6.30E-03                   |                                 |
| PA0495                  | as22            | 554963_555078   | 116             | na                   | na                | <i>atzF</i>                                | 3                                                   | Allophanate hydrolase subunit 1         | 1                          | 1                          | 38                         | 38                      | 1.00                                   | 0.00                          | 2.42                              | 1.27                     | 1.04E-02                   | 1.04E-02                        |
| PA4554                  | as197           | 5101107_5101200 | 94              | na                   | na                | <i>pilY1</i>                               | 2                                                   | Pilus                                   | 5                          | 10                         | 58588                      | 5160                    | 2.74                                   | 1.45                          | 2.07                              | 1.05                     | 8.82E-11                   | 6.61E-09                        |
| PA2319_Pant213_Pant2320 | 2557983_2558363 | 381             | 2557965_2558917 | 952                  | <i>gntR</i>       | ?                                          | regulator of glucose/gluconate metabolism           | 1                                       | 2                          | 65                         | 92                         | 2.74                    | 1.45                                   | 2.07                          | 1.05                              | 3.73E-03                 | 3.88E-03                   |                                 |
| PA5190_Pant479_Pant5191 | 5843826_5843965 | 140             | 5843801_5844053 | 252                  | NfnB/LpIA         | ?                                          | NADPH quinone oxidoreductase/polar fimbrial protein | 1                                       | 2                          | 110                        | 578                        | 2.74                    | 1.45                                   | 2.07                          | 1.05                              | 3.73E-03                 | 3.88E-03                   |                                 |
| PA4554                  | as198           | 5101511_5101611 | 101             | na                   | na                | <i>pilY1</i>                               | 2                                                   | Pilus                                   | 3                          | 8                          | 854                        | 3007                    | 2.05                                   | 1.04                          | 1.49                              | 0.58                     | 2.47E-03                   | 2.61E-03                        |

\* PAO1 locus number

\*\* Category: 1 = Quorum sensing; 2 = Adherence/Motility; 3 = Energy/Metabolism; 4 = Fe/Heme; 5 = DNA; 6 = RNA; 7 = Protein; 8 = Virulence; 9 = Transport; 10 = Fatty acids; 11 = Cell wall/Envelope; 12 = Regulation/Signal transduction; 13 = Phage; 14 = Polyamines; 15 = Unknown
