# Supplementary material for: A High-Throughput Method for Identifying Novel Genes That Influence Metabolic Pathways Reveals New Iron and Heme Regulation in Pseudomonas aeruginosa
Source: PubMed Central journal article supplement (PMC7857532; doi:10.1128/msystems.00933-20), 2021-02-02
Supplement: mSystems.00933-20-st002.pdf [file mSystems.00933-20-st002.pdf]

**Table S2A. GO Enrichments**

| <b>ID</b>  | <b>Gene set Name</b>                    | <b># Gene set size</b> | <b># MetSeq genes</b> | <b>pvalue (hypergeometric)</b> | <b>Fraction of gene set</b> | <b>Genes*</b>                                                                                  |
|------------|-----------------------------------------|------------------------|-----------------------|--------------------------------|-----------------------------|------------------------------------------------------------------------------------------------|
| GO:0022857 | Transmembrane transporter activity      | 185                    | 13                    | 0.003672607                    | 0.07027027                  | PA0158,PA0426,PA1108, PA1247,PA2837,PA2925, PA3234,PA3305,PA4187, PA4804,PA5155,PA5378, PA5434 |
| GO:0020037 | Heme binding                            | 60                     | 7                     | 0.000822336                    | 0.116666667                 | PA0106,PA0509,PA1838, PA1941,PA4587,PA4613, PA4619                                             |
| GO:0038023 | signaling receptor activity             | 12                     | 3                     | 0.000502291                    | 0.25                        | PA4221,PA4514,PA4675                                                                           |
| GO:0016614 | Oxidoreductase activity                 | 13                     | 3                     | 0.000706505                    | 0.230769231                 | PA3710,PA4619,PA5372                                                                           |
| GO:0004222 | Metalloendopeptidase activity           | 16                     | 3                     | 0.001660859                    | 0.1875                      | PA0067,PA0277,PA5047                                                                           |
| GO:0051537 | 2 iron, 2 sulfur cluster binding        | 23                     | 3                     | 0.006718649                    | 0.130434783                 | PA0792,PA4904,PA4905                                                                           |
| GO:0006352 | DNA-templated transcription, initiation | 25                     | 3                     | 0.009107436                    | 0.12                        | PA0149,PA1455,PA2896                                                                           |

\*PAO1 locus number

**Table S2B. KEGG Enrichments**

| ID       | Gene set Name                                                      | # Gene set size | # MetSeq genes | pvalue (hypergeometric) | Fraction of gene set | Genes*                                    |
|----------|--------------------------------------------------------------------|-----------------|----------------|-------------------------|----------------------|-------------------------------------------|
| pae02024 | Quorum sensing                                                     | 95              | 6              | 0.040612871             | 0.0631579            | PA0652,PA1001,PA2843,PA4804,PA4913,PA4985 |
| pae00330 | Arginine and proline metabolism                                    | 44              | 4              | 0.015492103             | 0.0909091            | PA1027,PA1818,PA4163,PA4908,PA4976        |
| pae00640 | Propanoate metabolism                                              | 47              | 4              | 0.020184082             | 0.0851064            | PA0747,PA0792,PA0887,PA4733               |
| pae00627 | Aminobenzoate degradation<br>Cationic antimicrobial peptide (CAMP) | 17              | 3              | 0.00211518              | 0.1764706            | PA4163,PA4904,PA4905                      |
| pae01503 | resistance                                                         | 28              | 3              | 0.013628512             | 0.1071429            | PA0426,PA0920,PA1179                      |
| pae00010 | Glycolysis / Gluconeogenesis                                       | 37              | 3              | 0.03479919              | 0.0810811            | PA0887,PA1027,PA4733                      |
| pae00380 | Tryptophan metabolism                                              | 27              | 3              | 0.011990809             | 0.1111111            | PA1027,PA4163,PA4613                      |

\*PAO1 locus number

**Table S2C. Cytoscape Enrichments**

**Largest cluster (lower right)**

**Cluster 1**      **Transcriptional regulation**  
**KEGG**

| ID       | Gene set Name        | Gene set size | DE genes | Pvalue (hypergeometric) | Genes*                                           |
|----------|----------------------|---------------|----------|-------------------------|--------------------------------------------------|
| pae02020 | Two-component system | 200           | 7        | 2.14535E-06             | PA0463,PA0464,PA0652,PA0920,PA1179,PA1455,PA3349 |

**GO**

| ID         | Gene set Name                              | Gene set size | DE genes | Pvalue (hypergeometric) | Genes                        |
|------------|--------------------------------------------|---------------|----------|-------------------------|------------------------------|
| GO:0003677 | DNA binding                                | 337           | 5        | 0.003835118             | PA0463,PA0652,PA1179,PA1455, |
| GO:0006355 | regulation of transcription, DNA-templated | 358           | 4        | 0.022850285             | PA0463,PA0652,PA1179,PA2896  |
| GO:0003700 | DNA-binding transcription factor activity  | 278           | 3        | 0.038101909             | PA0652,PA1455,PA2896         |
| GO:000160  | phosphorelay signal transduction system    | 99            | 3        | 0.001038175             | PA0463,PA1179,PA3349         |

**Cluster 2**      **Transmembrane transport**

**GO**

| ID         | Gene set Name                             | Gene set size | DE genes | Pvalue (hyper) | Genes                       |
|------------|-------------------------------------------|---------------|----------|----------------|-----------------------------|
| GO:0003677 | DNA binding                               | 337           | 3        | 0.040463391    | PA0149,PA3898,PA4227        |
| GO:0022857 | transmembrane transporter activity        | 185           | 3        | 0.00538199     | PA0158,PA0426,PA2837        |
| GO:0055085 | transmembrane transport                   | 356           | 4        | 1.10E-02       | PA0158,PA0426,PA2837,PA5219 |
| GO:0003700 | DNA-binding transcription factor activity | 278           | 4        | 0.003895206    | PA0149,PA2492,PA3898,PA4227 |

**Cluster 3**      **Metabolism**

**KEGG**

| ID       | Gene set Name                                | Gene set size | DE genes | Pvalue (hyper) | Genes                                                   |
|----------|----------------------------------------------|---------------|----------|----------------|---------------------------------------------------------|
| pae01130 | Biosynthesis of antibiotics                  | 247           | 5        | 2.5509E-05     | PA0887,PA1001,PA1027,PA3517,PA4733                      |
| pae01110 | Biosynthesis of secondary metabolites        | 338           | 5        | 0.000149396    | PA0887,PA1001,PA1027,PA3517,PA4733                      |
| pae01200 | Carbon metabolism                            | 129           | 3        | 0.000307061    | PA0747,PA0887,PA4733                                    |
| pae00010 | Glycolysis / Gluconeogenesis                 | 37            | 3        | 2.13259E-06    | PA0887,PA1027,PA4733                                    |
| pae01100 | Metabolic pathways                           | 800           | 8        | 5.50556E-05    | PA0266,PA0747,PA0887,PA1001,PA1027,PA3517,PA4733,PA5093 |
| pae01120 | Microbial metabolism in diverse environments | 265           | 6        | 2.35786E-06    | PA0266,PA0887,PA1027,PA4733,PA4904,PA4905               |
| pae00640 | Propanoate metabolism                        | 47            | 4        | 9.68E-08       | PA0747,PA0792,PA0887,PA4733                             |
| pae00620 | Pyruvate metabolism                          | 61            | 3        | 1.62207E-05    | PA0887,PA1027,PA4733                                    |

**GO**

| ID         | Gene set Name                    | Gene set size | DE genes | Pvalue (hyper) | Genes                                     |
|------------|----------------------------------|---------------|----------|----------------|-------------------------------------------|
| GO:0003824 | catalytic activity               | 421           | 6        | 5.04981E-05    | PA0266,PA0268,PA0887,PA3517,PA4733,PA5093 |
| GO:0009058 | biosynthetic process             | 78            | 3        | 4.31548E-05    | PA0268,PA1001,PA1758                      |
| GO:0055114 | oxidation-reduction process      | 445           | 4        | 0.004864774    | PA0747,PA1027,PA4904,PA4905               |
| GO:0016491 | oxidoreductase activity          | 281           | 4        | 0.000622253    | PA0747,PA1027,PA4904,PA4905               |
| GO:0051537 | 2 iron, 2 sulfur cluster binding | 23            | 3        | 2.92E-07       | PA0792,PA4904,PA4905                      |

**Cluster 4**      **Heme binding**

**GO**

| ID         | Gene set Name               | Gene set size | DE genes | Pvalue (hyper) | Genes                              |
|------------|-----------------------------|---------------|----------|----------------|------------------------------------|
| GO:0009055 | electron transfer activity  | 82            | 3        | 6.93238E-05    | PA1941,PA4587,PA4619               |
| GO:0020037 | heme binding                | 60            | 5        | 8.90E-09       | PA0106,PA1838,PA1941,PA4587,PA4619 |
| GO:0055114 | oxidation-reduction process | 445           | 4        | 0.006619296    | PA0106,PA1838,PA4587,PA5181        |
| GO:0016491 | oxidoreductase activity     | 281           | 3        | 0.007116981    | PA1838,PA4587,PA5181               |

\*PAO1 locus number

**Table S2D. DAVID Enrichments**

| <b>Annotation Cluster 1</b> |                                      | <b>Enrichment Score: 1.489300855428664</b>  |          |               |                                                                        |                   |                 |                  |                        |                   |                  |            |
|-----------------------------|--------------------------------------|---------------------------------------------|----------|---------------|------------------------------------------------------------------------|-------------------|-----------------|------------------|------------------------|-------------------|------------------|------------|
| <b>Category</b>             | <b>Term</b>                          | <b>Count</b>                                | <b>%</b> | <b>PValue</b> | <b>Genes*</b>                                                          | <b>List Total</b> | <b>Pop Hits</b> | <b>Pop Total</b> | <b>Fold Enrichment</b> | <b>Bonferroni</b> | <b>Benjamini</b> | <b>FDR</b> |
| UP_SEQ_FEATURE              | signal peptide                       | 8                                           | 4.30     | 0.01          | PA4221, PA1169, PA2755, PA0845, PA4587, PA5040, PA5217, PA4613         | 31                | 101             | 1220             | 3.12                   | 0.48              | 0.28             | 8.95       |
| GOTERM_CC_DIRECT            | GO:0042597~periplasmic space         | 7                                           | 3.76     | 0.03          | PA1410, PA1169, PA2755, PA4587, PA5378, PA4613, PA0301                 | 94                | 69              | 2644             | 2.85                   | 0.53              | 0.53             | 23.03      |
| UP_KEYWORDS                 | Periplasm                            | 5                                           | 2.69     | 0.12          | PA1169, PA2755, PA4587, PA4613, PA0301                                 | 185               | 56              | 5494             | 2.65                   | 1.00              | 0.84             | 74.05      |
| <b>Annotation Cluster 2</b> |                                      | <b>Enrichment Score: 1.1050330157086925</b> |          |               |                                                                        |                   |                 |                  |                        |                   |                  |            |
| <b>Category</b>             | <b>Term</b>                          | <b>Count</b>                                | <b>%</b> | <b>PValue</b> | <b>Genes</b>                                                           | <b>List Total</b> | <b>Pop Hits</b> | <b>Pop Total</b> | <b>Fold Enrichment</b> | <b>Bonferroni</b> | <b>Benjamini</b> | <b>FDR</b> |
| GOTERM_MF_DIRECT            | GO:0020037~heme binding              | 7                                           | 3.76     | 0.02          | PA4619, PA1838, PA4587, PA1941, PA0509, PA0106, PA4613                 | 125               | 64              | 3597             | 3.15                   | 0.94              | 0.94             | 22.55      |
| UP_KEYWORDS                 | Iron                                 | 9                                           | 4.84     | 0.12          | PA4619, PA4221, PA1169, PA1838, PA4587, PA4904, PA4905, PA0106, PA4613 | 185               | 148             | 5494             | 1.81                   | 1.00              | 0.77             | 75.76      |
| UP_KEYWORDS                 | Heme                                 | 4                                           | 2.15     | 0.18          | PA4619, PA4587, PA0106, PA4613                                         | 185               | 44              | 5494             | 2.70                   | 1.00              | 0.80             | 88.66      |
| <b>Annotation Cluster 3</b> |                                      | <b>Enrichment Score: 1.0150459145791382</b> |          |               |                                                                        |                   |                 |                  |                        |                   |                  |            |
| <b>Category</b>             | <b>Term</b>                          | <b>Count</b>                                | <b>%</b> | <b>PValue</b> | <b>Genes</b>                                                           | <b>List Total</b> | <b>Pop Hits</b> | <b>Pop Total</b> | <b>Fold Enrichment</b> | <b>Bonferroni</b> | <b>Benjamini</b> | <b>FDR</b> |
| INTERPRO                    | IPR014710: RmlC-like jelly roll fold | 6                                           | 3.23     | 0.04          | PA0535, PA0652, PA2762, PA4499, PA0527, PA1140                         | 169               | 55              | 4955             | 3.20                   | 1.00              | 1.00             | 40.75      |
| INTERPRO                    | IPR013096: Cupin 2, conserved barrel | 3                                           | 1.61     | 0.09          | PA0535, PA4499, PA1140                                                 | 169               | 15              | 4955             | 5.86                   | 1.00              | 1.00             | 72.46      |
| INTERPRO                    | IPR011051: RmlC-like cupin domain    | 4                                           | 2.15     | 0.27          | PA0535, PA2762, PA4499, PA1140                                         | 169               | 53              | 4955             | 2.21                   | 1.00              | 1.00             | 98.58      |
| <b>Annotation Cluster 4</b> |                                      | <b>Enrichment Score: 1.004471094419736</b>  |          |               |                                                                        |                   |                 |                  |                        |                   |                  |            |
| <b>Category</b>             | <b>Term</b>                          | <b>Count</b>                                | <b>%</b> | <b>PValue</b> | <b>Genes</b>                                                           | <b>List Total</b> | <b>Pop Hits</b> | <b>Pop Total</b> | <b>Fold Enrichment</b> | <b>Bonferroni</b> | <b>Benjamini</b> | <b>FDR</b> |
| GOTERM_MF_DIRECT            | GO:0020037~heme binding              | 7                                           | 3.76     | 0.02          | PA4619, PA1838, PA4587, PA1941, PA0509, PA0106, PA4613                 | 125               | 64              | 3597             | 3.15                   | 0.94              | 0.94             | 22.55      |
| INTERPRO                    | IPR009056: Cytochrome c domain       | 4                                           | 2.15     | 0.10          | PA4619, PA4587, PA1941, PA0509                                         | 169               | 33              | 4955             | 3.55                   | 1.00              | 1.00             | 76.23      |
| GOTERM_MF_DIRECT            | GO:0009055~electron carrier activity | 6                                           | 3.23     | 0.45          | PA4619, PA5401, PA4587, PA1941, PA4905, PA0509                         | 125               | 127             | 3597             | 1.36                   | 1.00              | 1.00             | 99.90      |
| <b>Annotation Cluster 5</b> |                                      | <b>Enrichment Score: 0.9557228528500402</b> |          |               |                                                                        |                   |                 |                  |                        |                   |                  |            |
| <b>Category</b>             | <b>Term</b>                          | <b>Count</b>                                | <b>%</b> | <b>PValue</b> | <b>Genes</b>                                                           | <b>List Total</b> | <b>Pop Hits</b> | <b>Pop Total</b> | <b>Fold Enrichment</b> | <b>Bonferroni</b> | <b>Benjamini</b> | <b>FDR</b> |



|                      |                                                 |    |       |      |                                                                                                                                                                                                                                                                                                                                                                                                          |    |      |      |      |      |      |       |
|----------------------|-------------------------------------------------|----|-------|------|----------------------------------------------------------------------------------------------------------------------------------------------------------------------------------------------------------------------------------------------------------------------------------------------------------------------------------------------------------------------------------------------------------|----|------|------|------|------|------|-------|
| GOTERM_<br>CC_DIRECT | GO:0016021~integral<br>component of<br>membrane | 44 | 23.66 | 0.14 | PA4113, PA0319, PA0765,<br>PA1108, PA4689, PA5155,<br>PA5113, PA4925, PA3877,<br>PA0106, PA1708, PA4514,<br>PA1963, PA3641, PA1941,<br>PA3061, PA3340, PA4137,<br>PA0281, PA2252, PA5412,<br>PA0278, PA4187, PA5517,<br>PA4553, PA4556, PA0426,<br>PA5022, PA0158, PA3079,<br>PA2837, PA5042, PA5043,<br>PA0920, PA4221, PA4527,<br>PA1247, PA5477, PA4551,<br>PA2925, PA0464, PA3305,<br>PA5219, PA4528 | 94 | 1067 | 2644 | 1.16 | 0.97 | 0.83 | 70.47 |
|----------------------|-------------------------------------------------|----|-------|------|----------------------------------------------------------------------------------------------------------------------------------------------------------------------------------------------------------------------------------------------------------------------------------------------------------------------------------------------------------------------------------------------------------|----|------|------|------|------|------|-------|

**Annotation Cluster 6**      **Enrichment Score: 0.7302266828369305**

| Category         | Term                                              | Count | %    | PValue | Genes                  | List Total | Pop Hits | Pop Total | Fold Enrichment | Bonferroni | Benjamini | FDR   |
|------------------|---------------------------------------------------|-------|------|--------|------------------------|------------|----------|-----------|-----------------|------------|-----------|-------|
| INTERPRO         | IPR007627:RNA polymerase sigma-70 region 2        | 3     | 1.61 | 0.17   | PA0149, PA2896, PA1455 | 169        | 22       | 4955      | 4.00            | 1.00       | 1.00      | 92.21 |
| UP_KEYWORDS      | Sigma factor                                      | 3     | 1.61 | 0.18   | PA0149, PA2896, PA1455 | 185        | 23       | 5494      | 3.87            | 1.00       | 0.83      | 88.23 |
| INTERPRO         | IPR013325:RNA polymerase sigma factor, region 2   | 3     | 1.61 | 0.18   | PA0149, PA2896, PA1455 | 169        | 23       | 4955      | 3.82            | 1.00       | 1.00      | 93.64 |
| INTERPRO         | IPR013324:RNA polymerase sigma factor, region 3/4 | 3     | 1.61 | 0.18   | PA0149, PA2896, PA1455 | 169        | 23       | 4955      | 3.82            | 1.00       | 1.00      | 93.64 |
| INTERPRO         | IPR014284:RNA polymerase sigma-70 like domain     | 3     | 1.61 | 0.18   | PA0149, PA2896, PA1455 | 169        | 23       | 4955      | 3.82            | 1.00       | 1.00      | 93.64 |
| GOTERM_MF_DIRECT | GO:0016987~sigma factor activity                  | 3     | 1.61 | 0.23   | PA0149, PA2896, PA1455 | 125        | 26       | 3597      | 3.32            | 1.00       | 0.99      | 94.84 |

**Annotation Cluster 7**      **Enrichment Score: 0.6370721288423282**

| Category         | Term                                                             | Count | %    | PValue | Genes                                          | List Total | Pop Hits | Pop Total | Fold Enrichment | Bonferroni | Benjamini | FDR   |
|------------------|------------------------------------------------------------------|-------|------|--------|------------------------------------------------|------------|----------|-----------|-----------------|------------|-----------|-------|
| INTERPRO         | IPR010105:TonB-dependent siderophore receptor                    | 3     | 1.61 | 0.12   | PA4675, PA4221, PA4514                         | 169        | 18       | 4955      | 4.89            | 1.00       | 1.00      | 83.35 |
| GOTERM_MF_DIRECT | GO:0005506~iron ion binding                                      | 6     | 3.23 | 0.13   | PA4619, PA4675, PA4221, PA4514, PA4904, PA0106 | 125        | 79       | 3597      | 2.19            | 1.00       | 0.98      | 81.44 |
| GOTERM_MF_DIRECT | GO:0015344~siderophore uptake transmembrane transporter activity | 3     | 1.61 | 0.20   | PA4675, PA4221, PA4514                         | 125        | 24       | 3597      | 3.60            | 1.00       | 0.99      | 92.47 |
| GOTERM_CC_DIRECT | GO:0009279~cell outer membrane                                   | 6     | 3.23 | 0.22   | PA4675, PA4221, PA4514, PA4099, PA5040, PA2837 | 94         | 92       | 2644      | 1.83            | 1.00       | 0.85      | 86.15 |
| UP_KEYWORDS      | Receptor                                                         | 3     | 1.61 | 0.23   | PA4675, PA4221, PA4514                         | 185        | 27       | 5494      | 3.30            | 1.00       | 0.83      | 94.00 |
| UP_KEYWORDS      | TonB box                                                         | 3     | 1.61 | 0.29   | PA4675, PA4221, PA4514                         | 185        | 32       | 5494      | 2.78            | 1.00       | 0.89      | 97.61 |
| INTERPRO         | IPR012910:TonB-dependent receptor, plug                          | 3     | 1.61 | 0.33   | PA4675, PA4221, PA4514                         | 169        | 35       | 4955      | 2.51            | 1.00       | 1.00      | 99.62 |

|                  |                                                |   |      |      |                        |     |    |      |      |      |      |       |
|------------------|------------------------------------------------|---|------|------|------------------------|-----|----|------|------|------|------|-------|
| INTERPRO         | IPR000531:TonB-dependent receptor, beta-barrel | 3 | 1.61 | 0.33 | PA4675, PA4221, PA4514 | 169 | 35 | 4955 | 2.51 | 1.00 | 1.00 | 99.62 |
| GOTERM_MF_DIRECT | GO:0004872~receptor activity                   | 3 | 1.61 | 0.34 | PA4675, PA4221, PA4514 | 125 | 35 | 3597 | 2.47 | 1.00 | 1.00 | 99.22 |

**Annotation Cluster 8**      **Enrichment Score: 0.5859278366778857**

| Category         | Term                                                                           | Count | %    | PValue | Genes                                  | List Total | Pop Hits | Pop Total | Fold Enrichment | Bonferroni | Benjamini | FDR   |
|------------------|--------------------------------------------------------------------------------|-------|------|--------|----------------------------------------|------------|----------|-----------|-----------------|------------|-----------|-------|
| INTERPRO         | IPR015421:Pyridoxal phosphate-dependent transferase, major region, subdomain 1 | 5     | 2.69 | 0.13   | PA0268, PA0266, PA1818, PA5523, PA3798 | 169        | 58       | 4955      | 2.53            | 1.00       | 1.00      | 85.72 |
| INTERPRO         | IPR015424:Pyridoxal phosphate-dependent transferase                            | 5     | 2.69 | 0.14   | PA0268, PA0266, PA1818, PA5523, PA3798 | 169        | 59       | 4955      | 2.48            | 1.00       | 1.00      | 87.04 |
| INTERPRO         | IPR015422:Pyridoxal phosphate-dependent transferase, major region, subdomain 2 | 4     | 2.15 | 0.23   | PA0266, PA1818, PA5523, PA3798         | 169        | 49       | 4955      | 2.39            | 1.00       | 1.00      | 97.23 |
| UP_KEYWORDS      | Aminotransferase                                                               | 3     | 1.61 | 0.30   | PA0266, PA5523, PA3798                 | 185        | 33       | 5494      | 2.70            | 1.00       | 0.88      | 98.03 |
| GOTERM_MF_DIRECT | GO:0030170~pyridoxal phosphate binding                                         | 4     | 2.15 | 0.43   | PA0268, PA0266, PA5523, PA3798         | 125        | 69       | 3597      | 1.67            | 1.00       | 1.00      | 99.85 |
| UP_KEYWORDS      | Pyridoxal phosphate                                                            | 3     | 1.61 | 0.55   | PA0266, PA1818, PA5523                 | 185        | 55       | 5494      | 1.62            | 1.00       | 0.92      | 99.98 |

**Annotation Cluster 9**      **Enrichment Score: 0.3580117097059154**

| Category         | Term                                           | Count | %    | PValue | Genes                                  | List Total | Pop Hits | Pop Total | Fold Enrichment | Bonferroni | Benjamini | FDR   |
|------------------|------------------------------------------------|-------|------|--------|----------------------------------------|------------|----------|-----------|-----------------|------------|-----------|-------|
| INTERPRO         | IPR020846:Major facilitator superfamily domain | 5     | 2.69 | 0.36   | PA4113, PA1108, PA4187, PA5219, PA3877 | 169        | 89       | 4955      | 1.65            | 1.00       | 1.00      | 99.76 |
| INTERPRO         | IPR011701:Major facilitator superfamily        | 4     | 2.15 | 0.45   | PA4113, PA1108, PA5219, PA3877         | 169        | 73       | 4955      | 1.61            | 1.00       | 1.00      | 99.97 |
| GOTERM_BP_DIRECT | GO:0055085~transmembrane transport             | 5     | 2.69 | 0.52   | PA1247, PA1108, PA5219, PA5022, PA3877 | 94         | 119      | 2950      | 1.32            | 1.00       | 1.00      | 99.97 |

**Annotation Cluster 10**      **Enrichment Score: 0.3271039811625676**

| Category       | Term                           | Count | %    | PValue | Genes                                                          | List Total | Pop Hits | Pop Total | Fold Enrichment | Bonferroni | Benjamini | FDR    |
|----------------|--------------------------------|-------|------|--------|----------------------------------------------------------------|------------|----------|-----------|-----------------|------------|-----------|--------|
| UP_SEQ_FEATURE | topological domain:Cytoplasmic | 3     | 1.61 | 0.22   | PA1247, PA0426, PA4528                                         | 31         | 36       | 1220      | 3.28            | 1.00       | 1.00      | 92.55  |
| UP_KEYWORDS    | Cell inner membrane            | 8     | 4.30 | 0.62   | PA4113, PA2252, PA4527, PA1247, PA3641, PA0426, PA4528, PA5434 | 185        | 221      | 5494      | 1.08            | 1.00       | 0.94      | 100.00 |
| UP_SEQ_FEATURE | transmembrane region           | 4     | 2.15 | 0.77   | PA4113, PA1247, PA0426, PA4528                                 | 31         | 158      | 1220      | 1.00            | 1.00       | 1.00      | 100.00 |

**Annotation Cluster 11**      **Enrichment Score: 0.3267667414274468**

| Category     | Term                                  | Count | %    | PValue | Genes                  | List Total | Pop Hits | Pop Total | Fold Enrichment | Bonferroni | Benjamini | FDR   |
|--------------|---------------------------------------|-------|------|--------|------------------------|------------|----------|-----------|-----------------|------------|-----------|-------|
| KEGG_PATHWAY | pae00010:Glycolysis / Gluconeogenesis | 3     | 1.61 | 0.31   | PA4733, PA0887, PA1027 | 53         | 37       | 1705      | 2.61            | 1.00       | 0.95      | 97.53 |

|              |                                      |   |      |      |                                                                |    |     |      |      |      |      |       |
|--------------|--------------------------------------|---|------|------|----------------------------------------------------------------|----|-----|------|------|------|------|-------|
| KEGG_PATHWAY | pae00620:Pyruvate metabolism         | 3 | 1.61 | 0.55 | PA4733, PA0887, PA1027                                         | 53 | 60  | 1705 | 1.61 | 1.00 | 0.99 | 99.97 |
| KEGG_PATHWAY | pae01130:Biosynthesis of antibiotics | 8 | 4.30 | 0.60 | PA2843, PA3751, PA4733, PA0887, PA3517, PA1027, PA4613, PA4908 | 53 | 238 | 1705 | 1.08 | 1.00 | 0.99 | 99.99 |

**Annotation Cluster 12**  
**Enrichment Score: 0.3259336520377595**  
**4**

| Category         | Term                       | Count | %    | PValue | Genes                                                                                                                          | List Total | Pop Hits | Pop Total | Fold Enrichment | Bonferroni | Benjamini | FDR    |
|------------------|----------------------------|-------|------|--------|--------------------------------------------------------------------------------------------------------------------------------|------------|----------|-----------|-----------------|------------|-----------|--------|
| UP_KEYWORDS      | Transport                  | 16    | 8.60 | 0.21   | PA4113, PA2252, PA4587, PA5155, PA0426, PA5040, PA0106, PA5434, PA0301, PA4221, PA4527, PA4526, PA3641, PA1247, PA4099, PA2925 | 185        | 354      | 5494      | 1.34            | 1.00       | 0.82      | 91.74  |
| UP_KEYWORDS      | Cell membrane              | 13    | 6.99 | 0.53   | PA4113, PA2252, PA5155, PA0426, PA5367, PA3234, PA0106, PA5434, PA4527, PA3641, PA1247, PA2925, PA4528                         | 185        | 356      | 5494      | 1.08            | 1.00       | 0.92      | 99.98  |
| UP_KEYWORDS      | Cell inner membrane        | 8     | 4.30 | 0.62   | PA4113, PA2252, PA4527, PA1247, PA3641, PA0426, PA4528, PA5434                                                                 | 185        | 221      | 5494      | 1.08            | 1.00       | 0.94      | 100.00 |
| GOTERM_CC_DIRECT | GO:0005886~plasma membrane | 14    | 7.53 | 0.74   | PA4113, PA2252, PA5155, PA4187, PA5378, PA0426, PA0106, PA4527, PA3641, PA1247, PA2925, PA3305, PA4528, PA0281                 | 94         | 419      | 2644      | 0.94            | 1.00       | 0.99      | 100.00 |

**Annotation Cluster 13**  
**Enrichment Score: 0.3232486729449829**  
**4**

| Category         | Term                                                                    | Count | %    | PValue | Genes                                                                                                                                          | List Total | Pop Hits | Pop Total | Fold Enrichment | Bonferroni | Benjamini | FDR   |
|------------------|-------------------------------------------------------------------------|-------|------|--------|------------------------------------------------------------------------------------------------------------------------------------------------|------------|----------|-----------|-----------------|------------|-----------|-------|
| INTERPRO         | IPR011991:Winged helix-turn-helix DNA-binding domain                    | 15    | 8.06 | 0.16   | PA4769, PA0268, PA0149, PA1141, PA0491, PA1455, PA2591, PA2492, PA1859, PA0652, PA1179, PA0463, PA0527, PA2896, PA5382                         | 169        | 308      | 4955      | 1.43            | 1.00       | 1.00      | 90.71 |
| GOTERM_MF_DIRECT | GO:0003700~transcription factor activity, sequence-specific DNA binding | 13    | 6.99 | 0.41   | PA4769, PA0268, PA2492, PA3898, PA1859, PA0652, PA0149, PA4227, PA1141, PA2896, PA5382, PA1455, PA0491                                         | 125        | 316      | 3597      | 1.18            | 1.00       | 1.00      | 99.77 |
| UP_KEYWORDS      | DNA-binding                                                             | 18    | 9.68 | 0.41   | PA4769, PA0268, PA3898, PA0149, PA4227, PA5348, PA1141, PA2591, PA0491, PA1455, PA1859, PA0652, PA1179, PA3620, PA0463, PA0527, PA2896, PA5382 | 185        | 471      | 5494      | 1.13            | 1.00       | 0.92      | 99.67 |



|                  |                                                       |    |      |      |                                                                                                                                |     |     |      |      |      |      |        |
|------------------|-------------------------------------------------------|----|------|------|--------------------------------------------------------------------------------------------------------------------------------|-----|-----|------|------|------|------|--------|
| GOTERM_MF_DIRECT | GO:0003677~DNA binding                                | 14 | 7.53 | 0.45 | PA4769, PA0268, PA0149, PA5348, PA1141, PA0491, PA1455, PA2591, PA0652, PA1179, PA0463, PA0527, PA2896, PA5382                 | 125 | 354 | 3597 | 1.14 | 1.00 | 0.99 | 99.90  |
| UP_KEYWORDS      | Transcription regulation                              | 16 | 8.60 | 0.47 | PA4769, PA0268, PA3898, PA0149, PA4227, PA1141, PA2591, PA0491, PA1455, PA1859, PA0652, PA1179, PA0463, PA0527, PA2896, PA5382 | 185 | 429 | 5494 | 1.11 | 1.00 | 0.92 | 99.90  |
| UP_KEYWORDS      | Transcription                                         | 16 | 8.60 | 0.49 | PA4769, PA0268, PA3898, PA0149, PA4227, PA1141, PA2591, PA0491, PA1455, PA1859, PA0652, PA1179, PA0463, PA0527, PA2896, PA5382 | 185 | 435 | 5494 | 1.09 | 1.00 | 0.92 | 99.94  |
| GOTERM_BP_DIRECT | GO:0006355~regulation of transcription, DNA-templated | 9  | 4.84 | 0.57 | PA2492, PA3898, PA1179, PA4227, PA0463, PA0527, PA1141, PA1455, PA2591                                                         | 94  | 256 | 2950 | 1.10 | 1.00 | 1.00 | 99.99  |
| INTERPRO         | IPR005119:LysR, substrate-binding                     | 5  | 2.69 | 0.59 | PA2492, PA1859, PA1141, PA5382, PA0491                                                                                         | 169 | 121 | 4955 | 1.21 | 1.00 | 1.00 | 100.00 |
| INTERPRO         | IPR000847:Transcription regulator HTH, LysR           | 5  | 2.69 | 0.60 | PA2492, PA1859, PA1141, PA5382, PA0491                                                                                         | 169 | 122 | 4955 | 1.20 | 1.00 | 1.00 | 100.00 |
| GOTERM_BP_DIRECT | GO:0006351~transcription, DNA-templated               | 13 | 6.99 | 0.64 | PA4769, PA0268, PA3898, PA1859, PA0652, PA1179, PA4227, PA0463, PA1141, PA0527, PA2591, PA5382, PA0491                         | 94  | 406 | 2950 | 1.00 | 1.00 | 1.00 | 100.00 |
| COG_ONTOLOGY     | Transcription                                         | 7  | 3.76 | 0.78 | PA4769, PA2492, PA3898, PA1859, PA1141, PA0491, PA2591                                                                         | 57  | 174 | 1308 | 0.92 | 1.00 | 0.99 | 100.00 |

**Annotation Cluster 14**  
**Enrichment Score:**  
**0.2081293093564839**  
**7**

| Category       | Term                                    | Count | %    | PValue | Genes                                                                                  | List Total | Pop Hits | Pop Total | Fold Enrichment | Bonferroni | Benjamini | FDR    |
|----------------|-----------------------------------------|-------|------|--------|----------------------------------------------------------------------------------------|------------|----------|-----------|-----------------|------------|-----------|--------|
| UP_SEQ_FEATURE | nucleotide phosphate-binding region:ATP | 5     | 2.69 | 0.23   | PA1192, PA4526, PA3751, PA5516, PA3620                                                 | 31         | 101      | 1220      | 1.95            | 1.00       | 0.99      | 93.61  |
| UP_KEYWORDS    | Magnesium                               | 6     | 3.23 | 0.47   | PA1001, PA3751, PA0845, PA4733, PA0887, PA5516                                         | 185        | 134      | 5494      | 1.33            | 1.00       | 0.93      | 99.89  |
| UP_KEYWORDS    | Nucleotide-binding                      | 11    | 5.91 | 0.91   | PA1192, PA4526, PA3751, PA0652, PA4733, PA0887, PA3061, PA5516, PA4724, PA3620, PA0464 | 185        | 425      | 5494      | 0.77            | 1.00       | 1.00      | 100.00 |
| UP_KEYWORDS    | ATP-binding                             | 9     | 4.84 | 0.93   | PA1192, PA4526, PA3751, PA4733, PA0887, PA5516, PA4724, PA3620, PA0464                 | 185        | 365      | 5494      | 0.73            | 1.00       | 1.00      | 100.00 |

|                  |                        |   |      |      |                                                                        |     |     |      |      |      |      |        |
|------------------|------------------------|---|------|------|------------------------------------------------------------------------|-----|-----|------|------|------|------|--------|
| GOTERM_MF_DIRECT | GO:0005524~ATP binding | 9 | 4.84 | 0.99 | PA1192, PA4526, PA3751, PA4733, PA0887, PA5516, PA4724, PA3620, PA0464 | 125 | 426 | 3597 | 0.61 | 1.00 | 1.00 | 100.00 |
|------------------|------------------------|---|------|------|------------------------------------------------------------------------|-----|-----|------|------|------|------|--------|

**Annotation Cluster 15**      **Enrichment Score: 0.1499412786633949**  
3

| Category         | Term                                                              | Count | %    | PValue | Genes                                                  | List Total | Pop Hits | Pop Total | Fold Enrichment | Bonferroni | Benjamini | FDR    |
|------------------|-------------------------------------------------------------------|-------|------|--------|--------------------------------------------------------|------------|----------|-----------|-----------------|------------|-----------|--------|
| KEGG_PATHWAY     | pae02020:Two-component system                                     | 7     | 3.76 | 0.49   | PA0920, PA3349, PA0652, PA1179, PA0464, PA0463, PA1455 | 53         | 183      | 1705      | 1.23            | 1.00       | 0.99      | 99.88  |
| UP_KEYWORDS      | Two-component regulatory system                                   | 3     | 1.61 | 0.68   | PA1179, PA0464, PA0463                                 | 185        | 69       | 5494      | 1.29            | 1.00       | 0.96      | 100.00 |
| GOTERM_BP_DIRECT | GO:0000160~phosphorelay signal transduction system                | 3     | 1.61 | 0.70   | PA3349, PA1179, PA0463                                 | 94         | 76       | 2950      | 1.24            | 1.00       | 1.00      | 100.00 |
| SMART            | SM00448:REC                                                       | 3     | 1.61 | 0.70   | PA3349, PA1179, PA0463                                 | 30         | 88       | 1071      | 1.22            | 1.00       | 1.00      | 100.00 |
| GOTERM_CC_DIRECT | GO:0005622~intracellular                                          | 6     | 3.23 | 0.80   | PA3349, PA0652, PA4986, PA1179, PA0464, PA0463         | 94         | 187      | 2644      | 0.90            | 1.00       | 0.99      | 100.00 |
| INTERPRO         | IPR001789:Signal transduction response regulator, receiver domain | 3     | 1.61 | 0.82   | PA3349, PA1179, PA0463                                 | 169        | 90       | 4955      | 0.98            | 1.00       | 1.00      | 100.00 |
| INTERPRO         | IPR011006:CheY-like superfamily                                   | 3     | 1.61 | 0.83   | PA3349, PA1179, PA0463                                 | 169        | 93       | 4955      | 0.95            | 1.00       | 1.00      | 100.00 |

\*PAO1 locus number
