# Supplementary material for: A High-Throughput Method for Identifying Novel Genes That Influence Metabolic Pathways Reveals New Iron and Heme Regulation in Pseudomonas aeruginosa
Source: PubMed Central journal article supplement (PMC7857532; doi:10.1128/msystems.00933-20), 2021-02-02
Supplement: mSystems.00933-20-st003.pdf [file mSystems.00933-20-st003.pdf]

**Table S3. Strains, plasmids and oligos used in this study.**

| Strain/Plasmid                                | Description                                                                                                                                                                           | Source                                                                                          |
|-----------------------------------------------|---------------------------------------------------------------------------------------------------------------------------------------------------------------------------------------|-------------------------------------------------------------------------------------------------|
| <b><i>E. coli</i> strains</b>                 |                                                                                                                                                                                       |                                                                                                 |
| DH5 $\alpha$                                  | Cloning and plasmid maintenance strain                                                                                                                                                | Lab stock                                                                                       |
| XL1-Blue                                      | Cloning and plasmid maintenance strain                                                                                                                                                | Lab stock                                                                                       |
| CC118 $\lambda$ pir                           | Expresses the $\lambda$ pir protein, allowing replication of suicide plasmids with the R6K origin of replication.                                                                     | A. Filloux lab stock                                                                            |
| SM10 $\lambda$ pir                            | <i>P. aeruginosa</i> conjugation donor strain<br>Expresses the $\lambda$ pir protein, allowing replication of suicide plasmids with the R6K origin of replication.<br>Km <sup>R</sup> | A. Filloux lab stock<br>(Simon <i>et al.</i> , 1983)                                            |
| T7 Express <i>lysY<sup>iq</sup></i>           | Protein expression strain.                                                                                                                                                            | New England Biolabs,<br>Ipswich, MA                                                             |
| T7 Express <i>lysY<sup>iq</sup></i><br>PA0709 | Protein expression strain harbouring pET15DG1<br>PA0709                                                                                                                               | This study                                                                                      |
| T7 Express <i>lysY<sup>iq</sup></i><br>PA3390 | Protein expression strain harbouring pET15DG1<br>PA3390                                                                                                                               | This study                                                                                      |
| <b><i>P. aeruginosa</i> strains</b>           |                                                                                                                                                                                       |                                                                                                 |
| WT MPAO1                                      | Wild-type <i>P. aeruginosa</i> PAO1 strain (clinical, non-respiratory isolate)                                                                                                        | Manoil Lab.<br>(Holloway, 1955;<br>Jacobs <i>et al.</i> , 2003;<br>Stover <i>et al.</i> , 2000) |
| $\Delta$ phuR                                 | Unmarked deletion of <i>phuR</i> in MPAO1 background. Mutant retains the first two and last two codons of the <i>phuR</i> gene                                                        | This study                                                                                      |
| $\Delta$ phuS                                 | Unmarked deletion of <i>phuS</i> in MPAO1 background. Mutant retains the first two and last two codons of the <i>phuS</i> gene                                                        | This study                                                                                      |
| $\Delta$ phuUV                                | Unmarked deletion of <i>phuUV</i> in MPAO1 background. Mutant retains the first two codons of the <i>phuU</i> gene and the last two codons of the <i>phuV</i> gene                    | This study                                                                                      |
| $\Delta$ hasR                                 | Unmarked deletion of <i>hasR</i> in MPAO1 background. Mutant retains the first two and last two codons of the <i>hasR</i> gene                                                        | This study                                                                                      |
| $\Delta$ hxC                                  | Unmarked deletion of <i>hxC</i> in MPAO1 background. Mutant retains the first two and last two codons of the <i>hxC</i> gene                                                          | This study                                                                                      |
| $\Delta$ OMR                                  | Unmarked deletions of <i>phuR</i> , <i>hasR</i> and <i>hxC</i> in MPAO1 background. Mutant retains the first two and last two codons of each of the deleted genes                     | This study                                                                                      |
| $\Delta$ cheY                                 | Unmarked deletion of <i>cheY</i> in MPAO1 background. Mutant retains the first two and last two codons of the <i>cheY</i> gene                                                        | This study                                                                                      |
| $\Delta$ prfF1,2                              | Unmarked deletion of the PrrF1/2 sRNAs in PAO1 background                                                                                                                             | A.Oglesby-Sherrouse<br>(Wilderman <i>et al.</i> , 2004)                                         |
| $\Delta$ PA0028                               | Unmarked deletion of PA0028 in MPAO1 background. Mutant retains the first three and last three codons of the PA0149 gene                                                              | This study                                                                                      |
| $\Delta$ PA0149                               | Unmarked deletion of PA0149 in MPAO1 background. Mutant retains the first three and last three codons of the PA0149 gene                                                              | This study                                                                                      |

|         |                                                                                                                           |            |
|---------|---------------------------------------------------------------------------------------------------------------------------|------------|
| ΔPA0527 | Unmarked deletion of PA0149 in MPAO1 background. Mutant retains the first three and last three codons of the PA0527 gene  | This study |
| ΔPA0709 | Unmarked deletion of PA0709 in MPAO1 background. Mutant retains the first three and last three codons of the PA0709 gene  | This study |
| ΔPA3390 | Unmarked deletion of PA3390 in MPAO1 background. Mutant retains the first three and last three codons of the PA3390 gene. | This study |

| Plasmids        | Description                                                                                                         | Source                                      |
|-----------------|---------------------------------------------------------------------------------------------------------------------|---------------------------------------------|
| pSB109          | Medium copy number expression vector for expression of genes under control of the pBAD promoter. Gm <sup>R</sup> .  | Bardy Lab<br>Ketelboeter <i>et al.</i> 2017 |
| pIFP            | pSB109 expressing IFP1.4 under the control of the pBAD promoter. Gm <sup>R</sup> .                                  | This study                                  |
| pIFPHO          | pSB109 expressing the IFP+HO synthetic operon construct under the control of the pBAD promoter. Gm <sup>R</sup> .   | This study                                  |
| pIFPHO_AR       | pIFPHO modified to express the <i>bla</i> gene from pUCP19. Gm <sup>R</sup> and Amp <sup>R</sup> .                  | This study                                  |
| pBT20           | Mariner transposon mutagenesis vector. Gm <sup>R</sup> and Amp <sup>R</sup> .                                       | Kulasekara <i>et al.</i> 2005               |
| pBT20_AS        | pBT20 modified to lack the <i>bla</i> gene. Gm <sup>R</sup> and Amp <sup>S</sup> .                                  | This study                                  |
| pET-15b         | Vector for expression of His <sub>6</sub> -tagged proteins. Amp <sup>R</sup> .                                      | Novagen - EMD<br>Millipore                  |
| pET15DG1        | pET-15b modified to contain a TEV protease cleavage site in place of the thrombin cleavage site. Amp <sup>R</sup> . | This study                                  |
| pET15DG1 PA0709 | pET15DG1 containing PA0709. Amp <sup>R</sup> .                                                                      | This study                                  |
| pET15DG1 PA3390 | pET15DG1 containing PA3390. Amp <sup>R</sup> .                                                                      | This study                                  |

| Oligo description                              | Oligo name           | Nucleotide sequence (5'-3')                                      |
|------------------------------------------------|----------------------|------------------------------------------------------------------|
| Primers to poison pSB109<br><i>NcoI</i> site   | <i>NcoI</i> poison-F | GTTTCCACGGTGTGCGTCGATGGGCAAATATTAT<br>ACGCAAG                    |
|                                                | <i>NcoI</i> poison-R | CTTGCGTATAATATTTGCCATCGACGCACACCGT<br>GGAAAC                     |
| Primers for construction of<br>pIFP and pIFPHO | IFP F1               | CATGTCACGTGACCCACTTCCATTCTTC                                     |
|                                                | IFP F2               | TCACGTGACCCACTTCCATTCTTC                                         |
|                                                | IFP R1               | TATGTCATTTGTCGTCGTCGTCTTTGTAGTCGAAT<br>TCAGCTTCTTTACGTTGAACTTGAC |
|                                                | IFP R2               | TGTCATTTGTCGTCGTCGTCTTTGTAGTCGAATTC<br>AGCTTCTTTACGTTGAACTTGAC   |
|                                                | IFPHO R1             | TATGTCATTTGTCGTCGTCGTCTTTGTAGTCACCT<br>TCTGAAGTAGCAAGACCAACTTC   |
|                                                | IFPHO R2             | TGTCATTTGTCGTCGTCGTCTTTGTAGTCACCTTC<br>TGAAGTAGCAAGACCAACTTC     |

|                                                                |                |                              |
|----------------------------------------------------------------|----------------|------------------------------|
|                                                                | pSB109 seq F   | GAAAAGTCCACATTGATTATTTGCACG  |
|                                                                | pSB109 seq R   | CGGGCCTCTTCGCTATTACG         |
| Primers for construction of MPAO1 $\Delta$ <i>phuR</i> mutant  | phuR_primer 1  | CGATATCCGGCGAGACCACC         |
|                                                                | phuR_primer 2  | TCAGATGTTCGAGCGGCATGTGGGACTC |
|                                                                | phuR_primer 3  | ATGCCGCTCGACATCTGACCCGTTACC  |
|                                                                | phuR_primer 4  | CCAGCTCCACCCAGAGGC           |
|                                                                | phuR_primer 5  | CCTTCAACGCGGCCAGC            |
|                                                                | phuR_primer 6  | GCCGTATCGAAACGCTCC           |
| Primers for construction of MPAO1 $\Delta$ <i>phuS</i> mutant  | phuS_primer 1  | CGCTGAAGAAGTCGTTGG           |
|                                                                | phuS_primer 2  | TCAGAGCGCGCTGCTCATCGACGGTTC  |
|                                                                | phuS_primer 3  | ATGAGCAGCGCGCTCTGAGGAGAGATC  |
|                                                                | phuS_primer 4  | CGCGATCCAGTCCGCCTGG          |
|                                                                | phuS_primer 5  | CGAGGTCAACCAGGAGTGG          |
|                                                                | phuS_primer 6  | CGGCTTCCGTA CT CAGCG         |
| Primers for construction of MPAO1 $\Delta$ <i>phuUV</i> mutant | phuUV_primer 1 | CGTCCTGCTGGTGATCGG           |
|                                                                | phuUV_primer 2 | TCAACGGGCGACCAACACGAGCGAAAT  |
|                                                                | phuUV_primer 3 | GTGTTGGTCCCGTTGAAGGAGTCGC    |
|                                                                | phuUV_primer 4 | CGCATGATCTCGCTCCGCT          |
|                                                                | phuUV_primer 5 | CTGCCGAGGGCGTGCTGG           |
|                                                                | phuUV_primer 6 | GCATGGCGACTCCTTCAACG         |
| Primers for construction of MPAO1 $\Delta$ <i>hxC</i> mutant   | hxC_primer 1   | CCGTGGCGGTGAAACAGGG          |
|                                                                | hxC_primer 2   | TCAGAAGAACAAGGTCATGCTGGA ACT |
|                                                                | hxC_primer 3   | ATGACCTTGTTCTTCTGAGGGGCGTCA  |
|                                                                | hxC_primer 4   | GCACCGCCAGTCTCGACC           |
|                                                                | hxC_primer 5   | CCTCGCCTACGGCACGGC           |
|                                                                | hxC_primer 6   | CCTGCTGCTGCTCAAGAC           |
| Primers for construction of MPAO1 $\Delta$ <i>cheY</i> mutant  | cheY_primer 1  | CGACGCGATCCGCGCGATC          |
|                                                                | cheY_primer 2  | TCAGCCGTTAATTTTCATGTTCTTGTC  |
|                                                                | cheY_primer 3  | ATGAAAATTAACGGCTGAAGCCGGCCA  |
|                                                                | cheY_primer 4  | GAGGAACTGTTTCGATGCGC         |
|                                                                | cheY_primer 5  | GGAGCAACTGATCCAGCG           |

|                                                             |                |                                                          |
|-------------------------------------------------------------|----------------|----------------------------------------------------------|
|                                                             | cheY_primer 6  | GCTCCAGCGCGGCCTGGTG                                      |
| Primers to check PA0028 mutant                              | PA0028 check F | GACTACCTCTGGTACCGCCT                                     |
|                                                             | PA0028 check R | CGTTTCGATGCCAACCAGGAG                                    |
| Primers to check PA0149 mutant                              | PA0149 check F | GACTACCTCTGGTACCGCCT                                     |
|                                                             | PA0149 check R | CGTTTCGATGCCAACCAGGAG                                    |
| Primers to check PA0527 mutant                              | PA0527 check F | GAAGTGAACCATGAGCGGG                                      |
|                                                             | PA0527 check R | CTTCGCGCTGTACGGGTTTTTC                                   |
| Primers to check PA0709 mutant                              | PA0709 check F | GTGTGGCCGAACACATAGAG                                     |
|                                                             | PA0709 check R | GCGAACCGACCTACTACTCG                                     |
| Primers to check PA3390 mutant                              | PA3390 check F | GTTGCCGGATGCTAGGAGG                                      |
|                                                             | PA3390 check R | CATCCGCTCCTGCTTCATGG                                     |
| Primers to construct PA3390 mutant                          | PA3390 BamHI F | GGATCCCTTCAGGGAGAGGGGAGAG                                |
|                                                             | PA3390 Up R    | GATTGAGCCTTCTCAGCGCAGGCAGTACACGGAA<br>ACTTCCTTTTG        |
|                                                             | PA3390 Down F  | CAAAGGAAGTTTCCGTGTA<br>CTGCCTGCGCTGAGAAGGCTCAATC         |
|                                                             | PA3390 SpeI R  | ACTAGTGACAAGCCGCGACTGAAGG                                |
| Primers for construction of pUCP19-phuUV complement plasmid | phuUV_Forward  | GATACAAGCTTCGAAACCGCTGAGTACG                             |
|                                                             | phuUV_Reverse  | GCTAGGGATCCTCAACGGGCGACGATCAG                            |
| Primers for amplification of pUCP19 bla                     | pUCP19_bla_F   | CTAGACTGCAGCGTCAGGTGGCACTTTTCG                           |
|                                                             | pUCP19_bla_R   | CGATGCTGCAGGGATCTCAAGAAGATCCTTTGAT<br>C                  |
| Primers used in <i>Tn</i> -seq analysis                     | pBT20-92_1     | GAGCATCGTTTGTTCGCCGGCTTCTGTATGG                          |
|                                                             | olj376         | GTGACTGGAGTTCAGACGTGTGCTCTTCCGATCT<br>GGGGGGGGGGGGGGGGGG |

|                                                                         |                        |                                                                                     |
|-------------------------------------------------------------------------|------------------------|-------------------------------------------------------------------------------------|
|                                                                         | pBT20_PAIR_Am<br>pF_2  | AATGATACGGCGACCACCGAGATCTACACTCTTT<br>CGTCTAGAAGCCTGCTTTCTAGAGACCGGGGACT<br>TATCAGC |
|                                                                         | TdT_Index_1_AT<br>CACG | CAAGCAGAAGACGGCATAACGAGATCGTGATGTGA<br>CTGGAGTTCAGACGTGTGCTCTTCCGATCT               |
|                                                                         | TdT_Index_3_TT<br>AGGC | CAAGCAGAAGACGGCATAACGAGATGCCTAAGTGA<br>CTGGAGTTCAGACGTGTGCTCTTCCGATCT               |
|                                                                         | TdT_Index_4_TG<br>ACCA | CAAGCAGAAGACGGCATAACGAGATTGGTCAGTGA<br>CTGGAGTTCAGACGTGTGCTCTTCCGATCT               |
|                                                                         | pBT20_SEQ-6            | CCTGCTTTCTAGAGACCGGGGACTTATCAGCCAA<br>C                                             |
| Primers for construction of<br>pET15DG1                                 | pET15b TEV F           | CATGGGCAGCAGCCATCATCATCATCACAGC<br>AGCGGCGAGAATCTTTATTTTCAGGGACA                    |
|                                                                         | pET15b TEV R           | TATGTCCCTGAAAATAAAGATTCTCGCCGCTGCTG<br>TGATGATGATGATGATGGCTGCTGCC                   |
| Primers for construction of<br>PA0709 and PA3390<br>expression plasmids | PA0709-F1              | TATGACCTACCACGTA CTGGTTC                                                            |
|                                                                         | PA0709-F2              | TGACCTACCACGTA CTGGTTC                                                              |
|                                                                         | PA0709-R1              | GATCCTCAACCCTCGACGCGGTAG                                                            |
|                                                                         | PA0709-R2              | CTCAACCCTCGACGCGGTAG                                                                |
|                                                                         | PA3390-F1              | TATGTACTGCATCTTTATCAAGGCC                                                           |
|                                                                         | PA3390-F2              | TGTACTGCATCTTTATCAAGGCC                                                             |
|                                                                         | PA3390-R1              | GATCCTCAGCGCAGCGGATTGAGC                                                            |
|                                                                         | PA3390-R2              | CTCAGCGCAGCGGATTGAGC                                                                |
